# Supplementary material for: Value-added by high-resolution regional simulations of climate-relevant aerosol properties
Source: Copernicus journal article supplement (doi:10.5194/acp-2016-453), 2016-05-31

## **Response to review comments on acp-2016-453 from reviewer 2**

**The original comments are provided in black, our response is given below each comment in red.**

**Thank you for the careful reading of our manuscript and your review.**

### **Summary**

The present work investigates how an increase in spatial (horizontal) resolution from 60 km to 12 km improves the ability of a mesoscale simulation with the WRF-Chem model to reproduce satellite observations of aerosol optical depth (AOD) and column concentrations of chemical species, and of key meteorological variables (relative to a reanalysis product). The WRF-Chem model is run for the year 2008 on a domain that covers the eastern USA, a region with strong emissions of natural and anthropogenic aerosol precursors.

The motivation of the work is established in the introduction. Simulations, observations, and reanalysis data are subsequently introduced with select relevant details, such as uncertainties in the satellite observations. The authors then provide an overview of the statistical methods used to evaluate model performance relative to observations and reanalysis in a succinct but effective way, which can serve as an introduction to novices to the subject. In the main part of the work the results are presented and analyzed, and the authors carefully quantify and discuss the improvements from an increase in resolution. It is found that a higher simulation resolution improves model fidelity in reproducing observed AOD as well as the ability of the model to identify extreme AOD values. The analysis reveals that the improved performance of the model at higher resolution can in part be attributed to improved agreement in meteorological quantities, in particular boundary layer specific humidity, which contributes to aerosol growth. The model is also shown to better reproduce satellite observations of chemical species at higher resolution. The authors do not fail to identify instances where a higher resolution does not result in an improvement: While model skill (measured by the Brier skill score) in reproducing AOD improves in seven out of twelve months, the model shows improvements in detecting extreme AOD values only in the warm season. In all this, statistical methods are used effectively to quantify model performance. The work addresses an interesting question of general importance in atmospheric modeling - what improvements can be expected from an increase in model resolution? The authors answer this question in exemplary fashion for aerosol properties, chemistry, and meteorology in a mesoscale model. The key insight is that increased spatial (horizontal) resolution clearly improves model performance but is not a panacea. Model aspects other than resolution need attention as well to improve model fidelity. The manuscript is thorough, clear, compelling, very well written, and presents the results with good figures and tables. I recommend publication after attending to the following detailed comments.

**Thank you for your positive assessment. We have addressed your detailed comments below and modified the manuscript accordingly.**

### **Detailed comments**

Line 51-52: Please give references for the possible range of values for the direct and indirect aerosol effects.

**Thanks for noting this. We have now added the following reference:**

**Stocker, T. F. a. Q., D. and Plattner, G.-K. and Alexander, L.V. and Allen, S.K. and Bindoff, N.L. and Bréon, F.-M. and Church, J.A. and Cubasch, U. and Emori, S. and Forster, P. and Friedlingstein, P. and Gillett, N. and Gregory, J.M. and Hartmann, D.L. and Jansen, E. and Kirtman, B. and Knutti, R. and Krishna Kumar, K. and Lemke, P. and Marotzke, J. and Masson-Delmotte, V. and Meehl, G.A. and Mokhov, I.I. and Piao,**

**S. and Ramaswamy, V. and Randall, D. and Rhein, M. and Rojas, M. and Sabine, C. and Shindell, D. and Talley, L.D. and Vaughan, D.G. and Xie, S.-P. (2013), Summary for Policymakers, in *Climate Change 2013: The Physical Science Basis. Contribution of Working Group I to the Fifth Assessment Report of the Intergovernmental Panel on Climate Change*, edited, pp. 33–115, Cambridge University Press, Cambridge, United Kingdom and New York, NY, USA.**

Section 2.1: Aerosol size distributions are generally log-normal, not power law functions. The upper tail of a log-normal distribution does, however, behave like a power law distribution. The discussion here is therefore not incorrect, however, it should be modified to assume a log-normal distribution (also because the aerosol scheme used in the WRF-Chem simulations assumes log-normal distributions).

**Thanks for this comment. We rephrased the paragraph as follows:**

**The relationship between the aerosol size distribution and spectral dependence of AOD is described by a power law function:**

$$\beta(\lambda) = \beta(\lambda_0) \times \lambda^{-\alpha} \quad (1)$$

**where  $\beta$  is the particle extinction coefficient,  $\lambda$  is the wavelength ( $\lambda_0=1\mu\text{m}$ ) and  $\alpha$  is the Ångström exponent (Ångström, 1964) which describes the wavelength dependence of AOD (and is inversely proportional to the average aerosol diameter  $D_p$ ):**

$$\alpha = -\frac{\ln \frac{AOD(\lambda_1)}{AOD(\lambda_2)}}{\frac{\lambda_2}{\lambda_1}} \quad (2)$$

**The aerosol volume distribution (and thus also its size distribution) can be often described as a multi-lognormal function with  $n$  modes:**

$$\frac{dV(r)}{d \ln r} = \sum_{i=1}^n \frac{C_i}{\sqrt{2\pi\sigma_i}} \exp\left[-\frac{(\ln r - \ln R_i)^2}{2\sigma_i^2}\right] \quad (3)$$

**where  $C_i$  is the particle volume concentration in the mode  $i$ ,  $R_i$  is the geometric mean radius and  $\sigma_i$  is the geometric standard deviation, thus we have:**

$$AOD(\lambda) = \int \frac{3\beta(m, r, \lambda)}{4r} \frac{dV(r)}{d \ln r} d \ln r dZ \quad (4)$$

**As indicated in (Schuster, 2006), “the spectral variability of extinction diminishes for particles larger than the incident wavelength”, thus fine mode particles contribute more to AOD in the visible ( $\lambda \sim 0.5 \mu\text{m}$ ) than at longer wavelengths, whereas coarse mode particles provide a similar AOD both at short and long wavelengths. This is reflected in the Ångström parameter which can be thus used as a proxy for the fine mode fraction or fine mode radius (Schuster, 2006).**

Line 417-418: "Further, the seasonal average spatial patterns of the total columnar concentrations, expressed in terms of z-scores, also exhibit high qualitative agreement with the satellite observations (Fig. S4-S7)."

It is a stretch to write "high qualitative agreement" here. Comparing the OMI, WRF60, and WRF12-remap panels in Fig. S4-S7, my impression is that omitting "high" and leaving "qualitative agreement" is a more accurate assessment.

**We agree. We modified the text accordingly and removed "high".**

Table 1: A factor of 9 is placed in the denominator of the Bonferroni correction, but the data at the different wavelengths, resolutions, and remappings would not seem to be truly independent significance tests. For example, WRF12 and WRF12-remap would seem to be very dependent. Please carefully consider (and justify) whether the factor of 9 should be used or rather omitted.

**We agree that some of the simulations are not really independent as also are the twelve months of the year. The Bonferroni correction can be applied to any set of experiments, either dependent or independent, and aims at providing the most conservative indication of the significance of a statistical test. Therefore we decided to keep the original significance assessment (i.e. with the factor 9) and clarified the explanation of the Bonferroni correction by removing the reference to independence at line 225 as follows:**

**"To assess the significance of  $\rho$  while accounting for multiple testing, we apply a Bonferroni correction (Simes, 1986) in which for  $m$  hypothesis tests, the null hypothesis is rejected if  $p \leq \frac{\alpha}{m}$ , where  $p$  is the p-value and  $\alpha$  is the confidence level (0.05 is used here)."**

Figure S5: OMI, WRF60, and WRF12-remap panels (or panel titles) are shuffled relative to the panel order in Figures S4, S6, and S7.

**Thanks for pointing this. We have now reordered the panels to be consistent with the other figures on the gas phase evaluation.**

1 **Value-added by high-resolution regional simulations of**  
2 **climate-relevant aerosol properties**

3

4 P. Crippa<sup>1</sup>, R. C. Sullivan<sup>2</sup>, A. Thota<sup>3</sup>, S. C. Pryor<sup>2,3</sup>

5

6

7 <sup>1</sup>COMET, School of Civil Engineering and Geosciences, Cassie Building, Newcastle  
8 University, Newcastle upon Tyne, NE1 7RU, UK

9 <sup>2</sup>Department of Earth and Atmospheric Sciences, Bradfield Hall, 306 Tower Road, Cornell  
10 University, Ithaca, NY 14853, USA

11 <sup>3</sup>Pervasive Technology Institute, Indiana University, Bloomington, IN 47405, USA

12

13 *Correspondence to:* P. Crippa ([paola.crippa@ncl.ac.uk](mailto:paola.crippa@ncl.ac.uk)), School of Civil Engineering and  
14 Geosciences, Cassie Building, Room G15, Telephone: +44 (0)191 208 5041, Newcastle  
15 University, Newcastle upon Tyne, NE1 7RU, UK

16 **Abstract**

17 Despite recent advances in global Earth System Models (ESMs), the current global mean  
18 aerosol direct and indirect radiative effects remain uncertain, as does their future role in  
19 climate forcing and regional manifestations. Reasons for this uncertainty include the high  
20 spatio-temporal variability of aerosol populations. Thus, limited area (regional) models  
21 applied at higher resolution over specific regions of interest are generally expected to ‘add  
22 value’, i.e. improve the fidelity of the physical-dynamical-chemical processes that induce  
23 extreme events and dictate climate forcing, via more realistic representation of spatio-  
24 temporal variability. However, added value is not inevitable, and there remains a need to  
25 optimize use of numerical resources, and to quantify the impact on simulation fidelity that  
26 derives from increased resolution. Here we quantify the value added by enhanced spatial  
27 resolution in simulations of the drivers of aerosol direct radiative forcing by applying the  
28 Weather Research and Forecasting model with coupled Chemistry (WRF-Chem) over eastern  
29 North America at different resolutions. Using Brier Skill Scores and other statistical metrics it  
30 is shown that enhanced resolution (from 60 to 12 km) improves model performance for all of  
31 the meteorological parameters and gas phase concentrations considered, in addition to both  
32 mean and extreme Aerosol Optical Depth (AOD) in three wavelengths in the visible relative  
33 to satellite observations, principally via increase of potential skill. Some of the enhanced  
34 model performance for AOD appears to be attributable to improved simulation of specific  
35 humidity and the resulting impact on aerosol hygroscopic growth/hysteresis.

36

37 **Keywords:** added value, high-resolution WRF-Chem simulations, aerosol optical properties,  
38 extreme AOD

## 39 **1 Motivation and Objectives**

40 Aerosols alter Earth’s radiation balance primarily by scattering or absorbing incoming solar  
41 radiation (direct effect, dominated by accumulation mode (diameters  $\sim$  wavelength ( $\lambda$ ), where  
42 total extinction is often quantified using AOD), or regulating cloud formation/properties by  
43 acting as cloud condensation nuclei (CCN) (indirect effect, dominated by diameters  $\geq$  100  
44 nm, magnitude =  $f(\text{composition})$ ). Most aerosols (excluding black carbon) have a larger  
45 scattering cross-section than absorption cross-section, and act as CCN thus enhancing cloud  
46 albedo and lifetimes. Hence increased aerosol concentrations are generally (but not  
47 uniformly) associated with surface cooling (offsetting a fraction of greenhouse gas warming)  
48 (Boucher, 2013;Myhre et al., 2013b) to a degree that is principally dictated by the aerosol  
49 concentration, size and composition, in addition to the underlying surface and height of the  
50 aerosol layer (McComiskey et al., 2008). Despite major advances in measurement and  
51 modeling, both the current global mean aerosol direct effect (possible range: -0.77 to +0.23  
52  $\text{W m}^{-2}$ ) and the indirect effect (possible range: -1.33 to -0.06  $\text{W m}^{-2}$ ) remain uncertain  
53 (Stocker, 2013), as does their future role in climate forcing (Rockel et al., 2008) and regional  
54 manifestations (Myhre et al., 2013a). Specific to our current study region (eastern N.  
55 America), one analysis using the NASA GISS global model found that the “regional radiative  
56 forcing from US anthropogenic aerosols elicits a strong regional climate response, cooling  
57 the central and eastern US by 0.5–1.0  $^{\circ}\text{C}$  on average during 1970–1990, with the strongest  
58 effects on maximum daytime temperatures in summer and autumn. Aerosol cooling reflects  
59 comparable contributions from direct and indirect radiative effects” (Leibensperger et al.,  
60 2012). A recent comparison of multiple global models conducted under the AEROCOM-  
61 project indicated this is also a region that exhibits very large model-to-model variability in  
62 simulated AOD ( $\langle\text{AOD}\rangle \sim 0.5$ ,  $\sigma(\text{AOD}) \sim 1$ ) (Myhre et al., 2013a).

63 Major reasons why aerosol radiative forcing on both the global and regional scales remains  
64 uncertain include short atmospheric residence times and high spatio-temporal variability of  
65 aerosol populations, and the complexity of the processes that dictate aerosol concentrations,  
66 composition and size distributions (Seinfeld and Pandis, 2016). Although aerosol processes  
67 and properties are increasingly being treated in the global Earth System Models (ESMs)  
68 (Long et al., 2015;Tilmes et al., 2015) being applied in Coupled Model Intercomparison  
69 Project Phase 6 (CMIP-6) (Meehl et al., 2014), the scales on which such models are applied  
70 remain much coarser than those on which aerosol population properties are known to vary  
71 (Anderson et al., 2003). Therefore, limited area atmospheric models (regional\_–models)

72 applied at higher resolution over specific regions of interest are expected to ‘add value’ (i.e.  
73 improve the fidelity) of the physical-dynamical-chemical processes that induce extreme  
74 events and dictate climate forcing. There is empirical evidence to suggest strong resolution  
75 dependence in simulated aerosol particle properties. For example, WRF-Chem simulations  
76 with spatial resolution enhanced from 75 km to 3 km provide exhibited higher correlations  
77 and lower bias relative to observations of aerosol optical properties over Mexico likely due to  
78 more accurate description of emissions, meteorology and of the physicochemical processes  
79 that convert trace gases to particles (Gustafson et al., 2011; Qian et al., 2010). As a result This  
80 improvement in the simulation of aerosol optical properties implies, a reduction of the  
81 uncertainty in associated aerosol radiative forcing will be also achieved (Gustafson et al.,  
82 2011). Further, when WRF-Chem is run over the United Kingdom and Northern France at  
83 multiple resolutions in the range of 40-160 km, it underestimated AOD by 10-16% and  
84 overestimated CCN by 18-36% relative to a high resolution run at 10 km, partly as a result  
85 of scale dependence of the gas-phase chemistry and different gas phase chemistry  
86 and differences in the aerosol uptake of water (Weigum et al., 2016).

87 However, debate remains regarding how to objectively evaluate model performance, quantify  
88 the value added by enhanced resolution (Di Luca et al., 2015; Rockel et al., 2008) and on  
89 possible limits to the improvement of climate representation in light of errors in the driving  
90 “imperfect lateral boundary conditions” (Diaconescu and Laprise, 2013). Nevertheless,  
91 although “it is unrealistic to expect a vast amount of added values since models already  
92 performs rather decently” (Di Luca et al., 2015) and global ESMs are now run at much higher  
93 resolution than in the past, it is generally assumed that high resolution regional models will  
94 add value via more realistic representation of spatio-temporal variability than global coarser-  
95 resolution simulations. Further, “the main added value of a regional climate model is  
96 provided by its small scales and its skill to simulate extreme events, particularly for  
97 precipitation” (Diaconescu and Laprise, 2013). (Qian et al., 2010)(Gustafson et al., 2011)

98 Here we quantify the value added by enhanced resolution in the description of the drivers of  
99 aerosol direct radiative forcing using year-long simulations from WRF-Chem over eastern  
100 North America. The primary performance evaluation focuses on AOD at ~~the~~ different  
101 wavelengths ( $\lambda = 470, 550$  and  $660$  nm, where the AOD at different  $\lambda$  is used as a proxy of  
102 the aerosol size distribution (Tomasi et al., 1983), see details in Sect. 2.1) and is measured  
103 relative to observations from satellite-borne instrumentation. Thus the term “value added” is  
104 used here to refer to an improvement of model performance in simulation of wavelength

105 specific AOD as measured by the MODerate resolution Imaging Spectroradiometer (MODIS)  
106 instrument aboard the polar-orbiting Terra satellite. We begin by quantifying the performance  
107 of WRF-Chem when applied over eastern North America at a resolution of 60 km (WRF60)  
108 (~ finest resolution likely to be employed in CMIP-6 global simulations) and then compare  
109 the results to those from simulations conducted at 12 km (WRF12) (simulation details are  
110 given in [Table 1](#)~~Table S1~~). Quantification of model skill is undertaken by mapping the  
111 WRF12 output to the WRF60 grid (WRF12-remap) and computing Brier Skill Scores (BSS)  
112 using MODIS as the target, WRF60 as the reference forecast and WRF12-remap as the  
113 forecast to be evaluated. We also evaluate the impact of simulation resolution on extreme  
114 AOD values that are associated with enhanced impacts on climate and human health. This  
115 analysis uses both *Accuracy* and *Hit Rate* as the performance metrics and focuses on the co-  
116 occurrence of extreme values in space from the model output and MODIS.

117 Our final analysis focuses on evaluation of the value-added by enhanced resolution in terms  
118 of key meteorological and gas-phase drivers of aerosol concentrations and composition and is  
119 conducted relative to the MERRA-2 reanalysis product for the physical variables and  
120 columnar gas concentrations from satellite observations (see details of the precise data sets  
121 used given below). The meteorological parameters considered are air temperature at 2 m  
122 ( $T_{2m}$ ), total monthly precipitation ( $PPT$ ), planetary boundary-layer height ( $PBLH$ ) and  
123 specific humidity in the boundary layer ( $Q_{PBL}$ ). The gas phase concentrations considered are:  
124 sulfur dioxide ( $SO_2$ ), ammonia ( $NH_3$ ), nitrogen dioxide ( $NO_2$ ) and formaldehyde (HCHO).

## 125 **2 Materials and Methods**

### 126 **2.1 Spectral dependence of AOD**

127 Three properties dictate the actual aerosol direct radiative forcing: AOD, single scattering  
128 albedo and asymmetry factor, all of which are a function of the wavelength ( $\lambda$ ) of incident  
129 radiation. The first property is related to the total columnar mass loading, typically dominates  
130 the variability of direct aerosol effect (Chin et al., 2009) and is the focus of the current  
131 research. The relationship between the aerosol size distribution and spectral dependence of  
132 AOD is ~~discussed~~ [described by a power law function; in detail in \(Tomasi et al., 1983\) but can](#)  
133 [be understood by considering a simplified example:](#)



134 
$$\beta(\lambda_1) = \beta(\lambda_2) \times \frac{\lambda_1^{-\alpha}}{\lambda_2} \quad (1)$$

135 where  $\beta$  is the particle extinction coefficient at a specific wavelength,  $\lambda$  is the wavelength  
 136 and  $\alpha$  is the Ångström exponent (Ångström, 1964) which describes the wavelength  
 137 dependence of AOD (and is inversely proportional to the average aerosol diameter  $D_p$ ):

138 
$$\alpha = - \frac{\ln \frac{AOD(\lambda_1)}{AOD(\lambda_2)}}{\frac{\lambda_2}{\lambda_1}} \quad (2)$$

139 The aerosol volume distribution (and thus also its size distribution) usually conforms to a  
 140 multi-lognormal function with  $n$  modes:

141 
$$\frac{dV(r)}{d \ln r} = \sum_{i=1}^n \frac{C_i}{\sqrt{2\pi}\sigma_i} \exp\left[ -\frac{(\ln r - \ln R_i)^2}{2\sigma_i^2} \right] \quad (3)$$

142 where  $C_i$  is the particle volume concentration in the mode  $i$ ,  $R_i$  is the geometric mean radius  
 143 and  $\sigma_i$  is the geometric standard deviation, thus we have:

144  
 145 
$$AOD(\lambda) = \int \frac{3\beta(m, r, \lambda)}{4r} \frac{dV(r)}{d \ln r} d \ln r dZ \quad (4)$$

146 As indicated in (Schuster, 2006), “the spectral variability of extinction diminishes for  
 147 particles larger than the incident wavelength”, thus fine mode particles contribute more to  
 148 AOD in the visible ( $\lambda \sim 0.5 \mu\text{m}$ ) than at longer wavelengths, whereas coarse mode particles  
 149 provide a similar AOD both at short and long wavelengths. This is reflected in the Ångström  
 150 parameter which can be thus used as a proxy for the fine mode fraction or fine mode radius  
 151 (Schuster, 2006) {Ackermann, 1998 #26}. Using Mie theory for spherical particles with radius  
 152 ( $r$ ):  $0.1 - 1 \mu\text{m}$ , if the aerosol size distribution is described by the Junge power law (Eq. 3) then  
 153  $\alpha \sim \nu - 2$  (i.e.  $\alpha - 1$ ):

154 
$$\frac{dN}{d \ln(r)} = K \times r^{-\nu} \quad (3)$$

155 where  $dN$  is the number of particles of size falling within the radius interval  $d \ln(r)$ ,  $K$  is a  
 156 constant (function of particle total number concentration) and  $\nu$  is the Junge parameter ( $\nu$  is

typically of the order of 2-3 for  $r < 10 \mu\text{m}$  and decreases with increasing proportion of coarse aerosols) (Tomasi et al., 1983). Thus, aerosol populations with a higher proportion of coarse mode aerosols will, on average, exhibit higher AOD in the longer wavelengths. (Schuster, 2006)

## 2.2 WRF-Chem simulations

WRF-Chem (version 3.6.1) simulations were performed for the calendar year 2008 over eastern North America, in a domain centered over southern Indiana ( $86^\circ\text{W}$ ,  $39^\circ\text{N}$ ) at two resolutions, one close to the finest resolution designed for CMIP-6 global model runs (i.e. 60 km, WRF60) and the other one at much higher resolution (12 km, WRF12). Simulation settings are identical for the two runs except for the time-step used for the physics (Table 1) Table S1). Physical and chemical parameterizations were chosen to match previous work using WRF-Chem at 12 km on the same region which showed good performance relative to observations and the year 2008 was selected because representative of average climate and aerosol conditions during 2000 - 2014 (Crippa et al., 2016). More specifically the simulations adopted the RADM2 chemical mechanism (Stockwell et al., 1990) and include use of a modal representation of the aerosol size distribution (MADE/SORGAM, (Ackermann et al., 1998; Schell et al., 2001)) with three lognormal modes and fixed geometric standard deviations ( $\sigma_{\text{Aitken}} = \text{i.e. } 1.7$ ,  $6$  and  $\sigma_{\text{accumulation}} = 2$  and  $2.5$  for Aitken, accumulation and coarse mode, respectively) (Ackermann et al., 1998; Grell et al., 2005). Aerosol direct feedback was turned on and coupled to the Goddard shortwave scheme (Fast et al., 2006). A and telescoping vertical grid with 32 model layers from the surface to 50 hPa and 10 model layers up from the surface to 800 hPa was selected. Meteorological initial and boundary conditions from the North American Mesoscale Model at 12 km resolution are applied every 6 hours, while initial and chemical boundary conditions are taken from MOZART-4 (Model for Ozone and Related chemical Tracers, version 4) with meteorology from NCEP/NCAR-reanalysis (Emmons et al., 2010). Anthropogenic emissions are specified for both WRF60 and WRF12 from the US National Emission Inventory 2005 (NEI-05) (US-EPA, 2009) which provides hourly point and area emissions at 4 km on 19 vertical levels. The simulation settings and specifically the use of a modal representation of the aerosol size distribution were selected to retain computational tractability. Accordingly, the 60 km simulations for the year 2008 completed in 6.4 hours whereas the 12 km simulations completed in 9.5 days (230 hours) on the Cray XE6/XK7 supercomputer (Big Red II) owned by Indiana University, using 256 processors distributed on 8 nodes.

190 Value added is quantified by degrading (averaging) hourly output from the 12 km resolution  
191 simulation to 60 km (hereafter WRF12-remap) as follows: the 12 km domain is resized  
192 excluding 2 grid cells at the border to exactly match the 60 km resolution domain. Each  
193 coarse grid cell thus includes 5×5 12 km resolution cells and its value is the mean of all valid  
194 12 km grid cells inside it if at least half of those cells contain valid AOD (i.e. no cloud cover),  
195 otherwise the whole coarse cell is treated as missing. In all comparisons only cells with  
196 simultaneous (i.e. model and MODIS) clear sky conditions are considered. A daily value  
197 from WRF-Chem is computed as an instantaneous value for the hour nearest to the satellite  
198 overpass time. When the comparison is done on a monthly basis, a monthly mean value is  
199 computed from the daily values obtained and under clear sky conditions, only if there are at  
200 least five valid observations in the month. A daily value is computed for the satellite overpass  
201 time, while a monthly mean is computed using values during the overpass hour and under  
202 clear sky conditions if there are at least five valid observations in the month.

### 203 **2.3 Observations**

204 Model aerosol optical properties are evaluated relative to the MODIS Collection 6 dark-target  
205 land aerosol product from aboard the Terra satellite (~1030 overpass local solar time (LST))  
206 (Levy et al., 2013). To provide a consistent assessment of model skill, the evaluation of AOD  
207 is conducted only on land areas since the MODIS dark-target ocean aerosol product is based  
208 on a retrieval algorithm different from the one over land (Levy et al., 2013). Trace gas  
209 concentrations are evaluated relative to measurements from the Ozone Monitoring Instrument  
210 (OMI; version 3) (Chance, 2002) and the Infrared Atmospheric Sounding Interferometer  
211 (IASI; NN version 1) (Whitburn, 2016) aboard the Aura (~1345 LST) and MetOp satellites  
212 (~0930 LST), respectively. MODIS retrieves AOD at multiple  $\lambda$  including 470, 550, and 660  
213 nm, and t. The MODIS algorithm removes cloud-contaminated pixels prior to spatial  
214 averaging over  $10 \times 10$  km (at nadir). OMI and IASI have nadir resolutions of  $13 \times 24$  km  
215 and 12 km (circular footprint), respectively, and have been filtered to remove retrievals with  
216 cloud fractions  $> 0.3$  (Fioletov et al., 2011; McLinden et al., 2014; Vinken et al., 2014) and  
217 OMI pixels affected by the row anomalies. MODIS, OMI, and IASI provide near daily global  
218 coverage, although the row anomalies render portions of the OMI viewing swath unusable.  
219 Uncertainty in AOD from MODIS is spatially and temporally variable. It has been estimated  
220 as  $\pm (0.05 \pm 0.15\%)$  for AOD over land (Levy et al., 2013), and prior research has  
221 reported 71% of MODIS Collection 5 retrievals fall within  $\pm 0.05 \pm 0.20\%$  for AOD  
222 relative to AERONET in the study domain (Hyer et al., 2011). The accuracy of OMI (“root

223 sum of the square of all errors, including forward model, inverse model, and instrument  
224 errors” (Brinksma, 2003)) is 1.1 DU or 50% for SO<sub>2</sub>,  $2 \times 10^{14}$  cm<sup>-2</sup>/30% for  
225 background/polluted NO<sub>2</sub> conditions, and 35% for HCHO. This uncertainty is typically  
226 reduced by spatial and temporal averaging, as ~~described below~~[employed herein](#) (Fioletov et  
227 al., 2011;Krotkov et al., 2008). IASI NH<sub>3</sub> retrievals do not use an a priori assumption of  
228 emissions, vertical distribution, or lifetime of NH<sub>3</sub> (i.e. no averaging kernel); therefore, NH<sub>3</sub>  
229 accuracy is variable, and thus only retrievals with uncertainty lower than the retrieved  
230 concentrations are used (Whitburn, 2016).

231 ~~For the model evaluation,~~[For the model evaluation, satellite observations for each day are](#)  
232 [regridded to the WRF-Chem domain discretization. This is done by averaging all valid](#)  
233 [retrievals within: 0.1° and 0.35° of the WRF-Chem grid-cell center for the 12×12 km and](#)  
234 [60×60 km resolutions, respectively for MODIS; 0.125° × 0.18° \(along-track/latitudinal ×](#)  
235 [cross-track/longitudinal\) and 0.365° × 0.42° for OMI; 0.12° and 0.36° for IASI of each WRF-](#)  
236 [Chem grid cell centroid, for the 12×12 km and 60×60 km resolutions, respectively. MODIS](#)  
237 [AOD; OMI SO<sub>2</sub>, NO<sub>2</sub>, and HCHO; and IASI NH<sub>3</sub> for each day are regridded to the WRF-](#)  
238 [Chem domain by averaging all valid retrievals within 0.1° and 0.35°; 0.125° × 0.18° and](#)  
239 [0.365° × 0.42°; and 0.12° and 0.36° of each WRF-Chem grid cell centroid, for the 12×12 km](#)  
240 [and 60×60 km resolutions, respectively.](#) To avoid issues from under-sampling, we require at  
241 least 10 valid MODIS granules for the 60×60 km daily average to be computed and at least 5  
242 daily averages to compute a monthly average for each grid cell. Model evaluation of gaseous  
243 species is performed on [a seasonal basis using](#) standard scores (z-scores), [which are](#)  
244 [computed](#)~~computed~~ [as the difference between relative to the seasonal mean within a grid cell](#)  
245 [and the seasonal spatial mean of each month, divided by the seasonal spatial standard](#)  
246 [deviation. The use of standard scores, which a](#) ~~allows~~ [comparing](#) ~~comparison of the~~ spatial  
247 patterns of satellite observations and model output in terms of standard deviation units from  
248 the mean.

249 The simulated meteorological properties are evaluated using Modern-Era Retrospective  
250 analysis for Research and Applications (MERRA-2) reanalysis data as the target. MERRA-2  
251 is a homogenized and continuous in time description of atmospheric properties on a 3-  
252 dimensional global grid (horizontal resolution of 0.5°×0.625°, L72), developed by NASA and  
253 was released in Fall 2015 (Molod et al., 2015). MERRA-2 provides hourly values of  $T_{2m}$  and  
254  $PBLH$ , and vertical profile of 3-dimensional variables every 3 hours on a large number of

255 pressure levels. Here we compute the total specific humidity ( $Q_{PBL}$ ) of the lowest 8 pressure  
 256 levels (i.e. in the boundary-layer approximated as the layer from 1000 to 825 hPa) in  
 257 MERRA-2, assuming an average air density in the PBL of  $1.1 \text{ kg m}^{-3}$ . For the evaluation of  
 258 simulated precipitation, we use accumulated monthly total values.

## 259 **2.4 Quantification of model performance and added-value**

260 Taylor diagrams summarize three aspects of model performance relative to a reference: the  
 261 spatial correlation coefficient (i.e. Pearson correlation of the fields,  $r$ ), the ratio of spatial  
 262 standard deviations of the two spatial fields ( $\sigma_{\text{wrf}}/\sigma_{\text{sat}}$ ) and the root mean squared difference  
 263 (Taylor, 2001). Here Taylor diagrams are presented for monthly mean AOD from WRF60,  
 264 WRF12 and WRF12-remap relative to MODIS at different wavelengths (Fig. 1 [d-f](#)). Because  
 265 AOD is not normally distributed, Spearman's rank correlation coefficients ( $\rho$ ) of the mean  
 266 monthly AOD spatial fields are also computed to reduce the impact of a few outliers and the  
 267 small sample size during cold months ([Table 2Table 2Table 4](#)). To assess the significance of  
 268  $\rho$  while accounting for multiple testing, we apply a Bonferroni correction (Simes, 1986) in  
 269 which for  $m$  independent hypothesis tests, the null hypothesis is rejected if  $p \leq \frac{\alpha}{m}$ , where  $p$   
 270 is the p-value and  $\alpha$  is the confidence level (0.05 is used here).

271 We further quantify the value added (or lack of thereof) of the high-resolution simulations  
 272 using the following metrics:

### 273 **(i) Brier Skill Score**

274 The primary metric used to quantify the added value of WRF12-remap versus WRF60 is the  
 275 Brier Skill Score (BSS) (Murphy and Epstein, 1989):

$$276 \quad BSS = \frac{r_{F'P'}^2 - \left( r_{F'P'} - \frac{\sigma_{F'}}{\sigma_{P'}} \right)^2 - \left( \frac{\langle P' \rangle - \langle F' \rangle}{\sigma_{P'}} \right)^2 + \left( \frac{\langle P' \rangle}{\sigma_{P'}} \right)^2}{1 + \left( \frac{\langle P' \rangle}{\sigma_{P'}} \right)^2} \quad (5)$$

277 where  $F$  is the “forecast” (i.e. the 12 km simulations mapped to 60 km, WRF12-remap);  $P$  is  
 278 the “target” (i.e. MODIS at 60 km) and output from WRF60 are used as the reference  
 279 forecast;  $F'$  the difference between 12 km estimates regridded to 60 km and MODIS;  $P'$  the  
 280 difference between the 60 km simulation and MODIS.

281 BSS measure ~~the improvement in the accuracy with which~~ how much a test simulation (i.e.  
282 WRF12-remap) more closely (or poorly) reproduces observations (from MODIS, MERRA-2  
283 or other satellite products) relative to a control (WRF60) run ~~over output from WRF60~~. A  
284  $BSS > 0$  indicates WRF12, even when regridded to 60 km, does add value. The first term in  
285 (45) ranges from 0 to 1, is described as the potential skill, and is the square of the spatial  
286 correlation coefficient between forecast and reference anomalies to MODIS. It is the skill  
287 score achievable if both the conditional bias (second term) and overall bias (third term) were  
288 zero, and for most of the variables considered herein (particularly AOD) it contributes to a  
289 positive BSS in most calendar months (and seasons). The second term (the conditional bias,  $>$   
290 0), is the square of the difference between the anomaly correlation coefficient and the ratio of  
291 standard deviation of the anomalies and is small if for all points  $F'$  is linear to  $P'$ . The third  
292 term is referred to as the forecast anomaly bias, and is the ratio of the difference between the  
293 mean anomalies of WRF12-remap and the observations relative to WRF60 and the standard  
294 deviation of WRF60 anomaly relative to observed values. The fourth term is the degree of  
295 agreement and appears in both the numerator and denominator. It is computed as the square  
296 of the ratio of the mean anomaly between WRF60 and observations and the standard  
297 deviation of the anomalies.

## 298 (ii) Pooled paired t-test

299 To identify which areas in space contribute most to the added value, we compare daily mean  
300 AOD fields from WRF-Chem at different resolutions and MODIS. We perform a pooled  
301 paired t-test to evaluate the null hypothesis that those differences come from normal  
302 distributions with equal means and equal but unknown variances (the test statistic has a  
303 Student's  $t$  distribution with  $df = n + m - 2$ , and the sample standard deviation is the pooled  
304 standard deviation, where  $n$  and  $m$  are the two sample sizes). The test is conducted by  
305 climatological season (e.g. winter = DJF) since there are fewer than 20 valid AOD  
306 observations in most 60 km grid cells for each calendar month (Fig. 2). Given the large  
307 number of hypothesis tests performed (i.e. one for each 60 km grid cell), we adjust the  $p$ -  
308 values using the False Discovery Rate (FDR) approach (Benjamini and Hochberg, 1995). In  
309 this approach,  $p$ -values from the  $t$ -tests are ranked from low to high ( $p_1, p_2, \dots, p_m$ ), then the  
310 test with the highest rank,  $j$ , satisfying:

$$311 \quad p_j \leq \frac{j}{m} \alpha \quad (6)$$

312 is identified. Here all  $p$ -values satisfying Eq. 5-6 with  $\alpha=0.1$  are considered significant.

### 313 (iii) Accuracy and Hit Rate in identification of extremes

314 For each month we identify grid cells in which the wavelength specific AOD exceeds the 75<sup>th</sup>  
315 percentile value computed from all grid cells and define that as an extreme. Thus grid cells  
316 with extreme AOD are independently determined for MODIS and WRF-Chem at different  
317 resolutions. The spatial coherence in identification of extremes in the fields is quantified  
318 using two metrics: the *Accuracy* and the *Hit Rate (HR)*. The *Accuracy* indicates the overall  
319 spatial coherence and is computed as the number of grid cells co-identified as extreme and  
320 non-extreme between WRF-Chem and MODIS relative to the total number of cells with valid  
321 data. The *HR* weights only correct identification of extremes in MODIS by WRF-Chem.

## 322 3 Results

### 323 3.1 Quantifying the value added of increased spatial resolution

324 When WRF-Chem is applied at 60 km resolution the degree of association of the resulting  
325 spatial fields of mean monthly AOD at the three wavelengths with MODIS varies seasonally.  
326 Smallest RMSD and highest Spearman spatial correlations ( $\rho$ ) with MODIS observations  
327 generally occur during months with highest mean AOD (i.e. during summer, Fig. 1 [d-f](#) and  
328 [Fig. 3](#)), and reach a maximum in August ( $\rho = 0.60$ , [Table 2Table 2Table 1](#)). However, while  
329 the patterns of relative AOD variability are well captured, the absolute magnitudes and spatial  
330 gradients of AOD during the summer are underestimated by WRF60 (Fig. 1 [d-f](#) and Fig. 3,  
331 [Table S21](#)). High spatial correlations ( $\rho > 0.40$ ) are also observed in March, April and  
332 November ([Table 2Table 2Table 1](#)), when the ratio of spatial standard deviations is closer to  
333 1 (Fig. 1 [d-f](#), [Table S2S1](#)). Only a weak wavelength dependence is observed in the  
334 performance metrics as described on Taylor diagrams. The spatial variability is generally  
335 more negatively biased for AOD at 660 nm ([Table S2S1](#)), indicating that WRF60 simulations  
336 tend to produce larger diameter aerosols homogeneously distributed over the domain,  
337 whereas MODIS observations indicate more spatial variability.

338 The performance of WRF60 simulations relative to MODIS contrasts with analyses of  
339 WRF12 and WRF12-remap. WRF12 and WRF12-remap indicate highest spatial correlations  
340 with MODIS observations throughout the summer months ( $\rho = 0.5-0.7$ , [Table 2Table 2Table 1](#)  
341 [4](#)), although the bias towards simulation of more coarse aerosols than are observed is  
342 consistent across the two simulations and with prior research (see details provided in (Crippa  
343 et al., 2016)). However, simulations at 12 km (WRF12) show positive  $\rho$  with MODIS for all  
344  $\lambda$  in all calendar months, while mean monthly spatial fields of AOD from WRF60 show low



345 and/or negative correlations with MODIS during May, June, September, October and  
346 December, indicating substantial differences in the degree of correspondence with MODIS  
347 AOD in the two simulations, and higher fidelity of the enhanced resolution runs (Tables [42](#)  
348 and [S21](#)).

349 Monthly mean spatial fields of AOD( $\lambda$ ) as simulated by WRF12 or WRF12-remap exhibit  
350 positive Spearman correlation coefficients ( $\rho$ ) with MODIS observations for all calendar  
351 months and range from  $\sim 0.25$  for WRF12-remap (0.20 for WRF12) during winter to  $\sim 0.70$   
352 and 0.64, respectively during summer ([Table 2Table 2Table 4](#)). Spearman's  $\rho$  are uniformly  
353 higher in WRF12-remap than WRF12 indicating a mismatch in space in the high-resolution  
354 simulation (i.e. that grid cells with high AOD are slightly displaced in the 12 km simulations  
355 possibly due to the presence of sub-grid scale aerosol plumes (Rissman et al., 2013)). Mean  
356 monthly fields of AOD (all  $\lambda$ ) from both WRF12 and WRF12-remap exhibit lower  $\rho$  with  
357 MODIS in February-April and November than the 60 km runs ([Table 2Table 2Table 4](#)).  
358 These discrepancies appear to be driven by conditions in the south of the domain. For  
359 example, differences between WRF60/WRF12-remap vs. MODIS during all seasons are  
360 significant according to the paired t-test over Florida and along most of the southern  
361 coastlines (Fig. 2). This region of significant differences extends up to  $\sim 40^\circ\text{N}$  during summer  
362 and fall, reflecting the stronger north-south gradient in AOD from MODIS and WRF12-  
363 remap that is not captured by WRF60 (see example for  $\lambda = 550$  nm, Fig. 3). These  
364 enhancements in the latitudinal gradients from WRF12-remap are also manifest in the  
365 physical variables (particularly specific humidity as discussed further below).

366 The differences in the absolute values of mean monthly AOD deriving from differences in the  
367 resolution at which WRF-Chem was applied are of sufficient magnitude (a difference of up to  
368 0.2 in regions with a mean AOD value of 0.4), particularly in the summer months (Fig. 4), to  
369 raise concerns. However, detailed investigation of the simulations settings and repetition of  
370 the 60 km simulation resulted in virtually identical results indicating no fault can be found in  
371 the analysis. Further, we note [this is a region that the eastern-half of North America was also](#)  
372 [identified as a region](#) of high discrepancy in global ESM (Myhre et al., 2013a).

373 To further investigate differences [in the simulation output](#) due to spatial discretization we  
374 computed Brier Skill Scores (BSS, [Eq. 4](#)). In this analysis AOD for each  $\lambda$  from WRF12-  
375 remap are used as the 'forecast', output from WRF60 are used as the reference forecast and  
376 MODIS observations at 60 km are used as the target. BSS exceed 0 during all months except



377 for September and October, and largest BSS ( $> 0.5$ ) for AOD (all  $\lambda$ ) is found during most  
378 months between December and July (Fig. 5). This indicates that running WRF-Chem at 12  
379 km resolution adds value relative to WRF60, even when the WRF12 output is remapped to 60  
380 km. BSS do not strongly depend on  $\lambda$ , indicating the added value from enhanced resolution  
381 similarly affects particles of different sizes. Inspecting the terms defining the BSS provides  
382 information about the origin of the added value (Fig. 5). The positive BSS derives principally  
383 from the potential skill (first term in Eq. 45), which demonstrates a reduction in bias and/or  
384 more accurate representation of the spatial gradients in WRF12-remap. This term exhibits a  
385 weak seasonality with values below 0.5 only during August and fall months. The second and  
386 third terms are close to zero during most months, although bigger biases are found during  
387 August-October. The substantial conditional bias during late summer and early fall is the  
388 result of the large ratio of standard deviations ( $> 1$ , i.e. the spatial variability of the anomaly  
389 relative to MODIS is larger for WRF12-remap than WRF60, Table S2S1). It thus contributes  
390 to the negative BSS found in September and October, which are also identified as outlier  
391 months in WRF12-remap from the Taylor diagram analysis (Fig. 1). Output for these months  
392 show modest spatial correlations with MODIS and higher ratio of standard deviations than in  
393 WRF60-MODIS comparisons (Fig. 1, Table S2S1). Previous work with analogous WRF-  
394 Chem settings showed that the lower model skill (in WRF12) during September and October  
395 can may be partially attributable to a dry bias in precipitation from WRF-Chem relative to  
396 observations. As a result, a positive bias in simulated AOD and near-surface aerosol nitrate  
397 and sulfate concentrations are positively biased is present over large regionparts of the  
398 domain (Crippa et al., 2016).

399 Model resolution also affects the *Accuracy* and *Hit Rate (HR)* for identification of areas of  
400 extreme AOD (AOD $>75^{\text{th}}$  percentile). Highest coherence in the identification of extreme  
401 AOD in space identified in WRF12-remap (and WRF12) relative to MODIS is found during  
402 May-August ( $HR = 53-77\%$ ) vs. WRF60 ( $HR = 17-54\%$ , Table 3Table-2). Conversely highest  
403  $HR$  are found for WRF60 and MODIS during winter and early spring, and indeed exceed  
404 those for WRF12 and WRF12-remap (Table 3Table-2, e.g. Feb:  $HR = 0.78$  for WRF60, and  
405 0.67 and 0.68 for WRF12 and WRF12-remap, respectively). These differences are consistent  
406 with the observation that WRF12-remap overestimates the scales of AOD coherence and  
407 AOD magnitude during the cold season along coastlines and over much of the domain in  
408 April (Fig. 3).

409 The synthesis of these analyses is thus that the higher resolution simulation increases the

410 overall spatial correlation, decreases overall bias in AOD close to the peak of the solar  
411 spectrum relative to MODIS observations and therefore the higher-resolution simulations  
412 better represent aerosol direct climate forcing. However, WRF12-remap exhibits little  
413 improvement over WRF60 in terms of reproducing the spatial variability of AOD ~~at these in~~  
414 ~~the visible~~ wavelengths and further that WRF12-remap tends to be more strongly positively  
415 biased in terms of mean monthly AOD outside of the summer months (Fig. 2 and Fig. 3).  
416 Also the improvement in detection of areas of extreme AOD in the higher resolution  
417 simulations (WRF12-remap) is manifest only during the warm season.

### 418 **3.2 Investigating the origin of the added value and sources of error in simulated AOD**

419 As documented above, WRF-Chem applied at either 60 or 12 km resolution over eastern  
420 North America exhibits some skill in reproducing observed spatial fields of AOD and the  
421 occurrence of extreme AOD values. However, marked discrepancies both in space and time  
422 are found, and at least some of them show a significant dependence on model resolution.  
423 Thus, we investigated a range of physical conditions and gas phase concentrations known to  
424 be strongly determinant of aerosol dynamics in terms of the BSS as a function of model  
425 resolution and also in terms of the mean monthly spatial patterns.

426 WRF12 even when remapped to 60 km provides more accurate description of key  
427 meteorological variables such as specific humidity ( $Q$ ) ~~within the boundary layer~~, *PBLH*,  
428 surface temperature and precipitation (Fig. 6, S1, S2 and S3) when ~~comparing compared~~ to  
429 MERRA-2, as indicated by the positive BSS during almost all months (Fig. 7a). Good  
430 qualitative agreement is observed for the spatial patterns and absolute magnitude of  $T_{2m}$  in  
431 both WRF60 and WRF12-remap relative to MERRA-2 for all seasons (Fig. S1) leading to  
432 only modest magnitude of BSS (i.e. value added by the higher resolution simulations (Fig.  
433 7a)). The aerosol size distribution and therefore wavelength specific AOD exhibits a strong  
434 sensitivity to  $Q$  (Santarpia et al., 2005) due to the presence of hygroscopic components in  
435 atmospheric aerosols and thus the role of water uptake in determining aerosol diameter,  
436 refractivity and extinction coefficient (Zieger et al., 2013). For example, the hygroscopic  
437 growth factor, which indicates the change of aerosol diameter due to water uptake, is  $\sim 1.4$   
438 for pure ammonium sulfate with dry diameter of 532 nm at relative humidity of 80%, thus  
439 biases in representation atmospheric humidity may lead to big errors in simulated aerosol size  
440 and AOD (Flores et al., 2012). Our previous analyses of the 12 km resolution simulations  
441 indicated overestimation of sulfate aerosols (a highly hygroscopic aerosol component, and

442 one which in many chemical forms exhibits strong hysteresis (Martin et al., 2004)) relative to  
443 observed near-surface  $PM_{2.5}$  concentrations during all seasons except for winter (Crippa et al.,  
444 2016), leading to the hypothesis that simulated AOD and discrepancies therein may exhibit a  
445 strong dependence on  $Q$ . Consistent with that postulate,  $Q_{PBL}$  from WRF12-remap exhibits a  
446 ~~wet-moist~~ bias in cloud-free grid cells mostly during warm months, whereas WRF60 is  
447 characterized by a dry bias during all seasons (Fig. 6). Despite the positive bias, WRF12-  
448 remap better captures the seasonal spatial patterns of  $Q_{PBL}$  in MERRA-2, leading to positive  
449 BSS in all calendar months. Thus, there is added value by higher-resolution simulations in  
450 representation of one of the key parameters dictating particle growth and optical properties.  
451 Spatial patterns of differences in  $Q_{PBL}$  from WRF60 and WRF12-remap relative to MERRA-  
452 2 (Fig. 6) exhibit similarities to differences in AOD (Fig. 4). WRF60 is dry-biased relative to  
453 WRF12 particularly during the summer (and fall) and underestimates  $Q_{PBL}$  relative to  
454 MERRA-2 during all seasons over the southern states and over most of continental US during  
455 summer and fall. Conversely, WRF12-remap overestimates  $Q_{PBL}$  over most of continental US  
456 during summer and fall relative to MERRA-2.

457  $PBLH$  is a key variable for dictating near-surface aerosol concentrations but is highly  
458 sensitive to the physical schemes applied, and biases appear to be domain and resolution  
459 dependent. However, this parameter is comparatively difficult to assess because differences  
460 in  $PBLH$  ~~PBL heights~~ between from WRF-Chem and MERRA-2 may also originate from the  
461 way they are computed (i.e. from heat diffusivity in MERRA-2 (Jordan et al., 2010) and from  
462 turbulent kinetic energy in WRF-Chem (Janjić, 2002; von Engel and Teixeira, 2013)).  
463 Nevertheless, ~~for example,~~ the Mellor-Yamada-Janjich  $PBL$  scheme combined with the  
464 Noah Land Surface Model applied in this work was found to produce lower  $PBL$  heights  
465 (Zhang et al., 2009) than other parameterizations. (Jordan et al., 2010)(Janjić, 2002)(von  
466 Engel and Teixeira, 2013) Thus, the positive bias in simulated AOD and surface  $PM_{2.5}$   
467 concentrations (reported previously in (Crippa et al., 2016)) may be linked to the systematic  
468 underestimation of  $PBLH$  simulated by WRF12-remap over continental US relative to  
469 MERRA-2 during all seasons (except winter) with greatest bias over regions of complex  
470 topography (Fig. S2). However, a positive bias (of several hundred meters) in terms of  
471  $PBLH$  for WRF simulations using the MYJ parameterization was previously reported for  
472 high-resolution simulations over complex terrain (Rissman et al., 2013), and a positive bias in  
473  $PBLH$  is also observed in the 60 km simulations presented herein (Fig. S2). This may provide  
474 a partial explanation for the strong negative bias in AOD in WRF60 during summer (Fig.

475 3). In general, the BSS indicate improvement in the simulation of *PBLH* in WRF12-remap  
476 than in WRF60 (Fig. 7a).

477 Consistent with the dry bias in  $Q_{PBL}$  in WRF60, total accumulated precipitation is also  
478 underestimated in WRF60, while WRF12-remap captures the absolute magnitudes and the  
479 spatial patterns therein (Fig. S3). Analysis of hourly precipitation rates also showed higher  
480 skill of WRF12-remap than WRF60 in correctly simulating precipitation occurrence (*HR*)  
481 relative to MERRA-2 (Table S32). More specifically WRF12-remap correctly predicts  
482 between 40% and 70 % of precipitation events in MERRA-2 with highest skill during winter  
483 months, whereas WRF60 output exhibits lower HR (~6% during summer and 30% during  
484 winter). This result thus confirms our expectation of a strong sensitivity of model  
485 performance to resolution due to the inherent scale dependence in the cumulus scheme.

486 Gas phase concentrations (transformed into *z*-scores) from WRF12-remap show higher  
487 agreement with satellite observations during almost all months, as indicated by the positive  
488 BSS (Fig. 7b). However given the limited availability of valid satellite observations  
489 (especially during months with low radiation intensity), the BSS are likely only robust for the  
490 summer months for all species. Nevertheless, with the exception of  $\text{NH}_3$  during June, BSS for  
491 all months are above or close to zero indicating [that](#) on average, the enhanced resolution  
492 simulations do improve the quality of the simulation of the gas phase species even when  
493 remapped to 60 km resolution. Further, the seasonal average spatial patterns of the total  
494 columnar concentrations, expressed in terms of *z*-scores, also exhibit [high](#)-qualitative  
495 agreement with the satellite observations (Fig. S4-S7).

#### 496 **4 Concluding remarks**

497 This analysis is one of the first to quantify the impact of model spatial resolution on the  
498 spatio-temporal variability and magnitude of AOD, [and does so using simulations for a full](#)  
499 [calendar year](#). Application of WRF-Chem at two different resolutions (60 km and 12 km)  
500 over eastern North America for a representative year (2008) leads to the following  
501 conclusions:

- 502 - Higher resolution simulations add value (i.e. enhance the fidelity of AOD at and near  
503 to the peak in the solar spectrum) relative to a coarser run, although the improvement  
504 in model performance is not uniform in space and time. Brier Skill Scores for the  
505 remapped simulations (i.e. output from simulations conducted at 12 km (WRF12)  
506 then averaged to 60 km, WRF12-remap) are positive for ten of twelve calendar months,

- 507 and for AOD( $\lambda=550$  nm) exceed 0.5 for seven of twelve months.
- 508 - Spatial correlations of output from WRF12 and WRF12-remap with observations  
509 from MODIS are higher than output from a simulation conducted at 60 km during  
510 most months. For example, in contrast to WRF-Chem simulations at 60 km (WRF60),  
511 simulations conducted at 12 km (WRF12) show positive spatial correlations with  
512 MODIS for all  $\lambda$  in all calendar months, and particularly during summer ( $\rho = 0.5-0.7$ ).
  - 513 - Output from WRF12 and WRF12-remap exhibit highest accord with MODIS  
514 observations in capturing the frequency, magnitude and location of extreme AOD  
515 values during summer when AOD is typically highest. During May-August WRF12-  
516 remap has *Hit Rates* for identification of extreme AOD of 53-78%.
  - 517 - At least some of the improvement in the accuracy with which AOD is reproduced in  
518 the higher resolution simulations may be due to improved fidelity of specific humidity  
519 and thus more accurate representation of hygroscopic growth of some aerosol  
520 components.
  - 521 - Higher-resolution simulations [also](#) add value in the representation of [other](#) key  
522 meteorological variables such as temperature, boundary layer height and precipitation.  
523 Both spatial patterns and precipitation occurrence are better captured by WRF12-  
524 remap.
  - 525 - More accurate representation of spatial patterns and magnitude of gaseous species [that](#)  
526 [play](#)ing a key role in particle formation and growth is [also](#) achieved by running WRF-  
527 Chem at high resolution.

528 It is worthy of note that even the 12 km resolution WRF-Chem simulations exhibit substantial  
529 differences in AOD relative to MODIS over eastern North America, and the agreement varies  
530 only slightly with wavelength. This may be partially attributable to use of the modal approach  
531 to represent the aerosol size distribution in order to enhance computational tractability. In this  
532 application each mode has a fixed geometric standard deviation ( $\sigma_g$ ), which can lead to biases  
533 in simulated AOD in the visible wavelengths by up to 25% (Brock et al., 2016) (with the  
534 model overestimating observations if the prescribed  $\sigma_g$  is larger than the observed one).  
535 Setting  $\sigma_g = 2$  for the accumulation mode (the default in WRF-Chem) may lead to an  
536 overestimation of the number of particles at the end of the accumulation mode tail, and there  
537 is evidence that a value of  $\sigma_{g,acc}=1.40$  leads to higher agreement with observations (Mann et  
538 al., 2012). Further possible sources of the AOD biases reported herein derive from selection  
539 of the physical schemes (e.g. planetary boundary layer (*PBL*) schemes and land-surface

540 model (Misenis and Zhang, 2010;Zhang et al., 2009)). Further, it is worth mentioning that  
541 NEI emissions are specified based on an average summertime weekday, so [higher-enhanced](#)  
542 model performance might be achieved if seasonally varying emissions ~~would-be~~  
543 available. Future work will include a systematic sensitivity analysis of these effects.

## 544 **Acknowledgments**

545 This research was supported in part by a L'Oréal-UNESCO UK and Ireland Fellowship For  
546 Women In Science (to PC), the Natural Environmental Research Council (NERC) through  
547 the LICS project (ref. NE/K010794/1), grants to SCP from US NSF (grants # ~~1102309~~ and  
548 1517365) and NASA (~~NNX16AG31Gunder NRA NNH14ZDA001N~~), and a NASA Earth  
549 and Space Science Fellowship Program - Grant "14-EARTH14F-0207" (to RCS). Further  
550 support was provided by the Lilly Endowment, Inc., through its support for the Indiana  
551 University Pervasive Technology Institute and the Indiana METACyt Initiative. We  
552 gratefully acknowledge the NASA scientists responsible for MERRA-2 and MODIS  
553 products, the developers of WRF-Chem, and Lieven Clarisse, Simon Whitburn, and Martin  
554 Van Damme for producing and sharing the NH<sub>3</sub> retrievals.

## 555 **References**

- 556 Ackermann, I. J., Hass, H., Memmesheimer, M., Ebel, A., Binkowski, F. S., and Shankar, U.:  
557 Modal aerosol dynamics model for Europe: development and first applications, *Atmos.*  
558 *Environ.*, 32, 2981-2999, [http://dx.doi.org/10.1016/S1352-2310\(98\)00006-5](http://dx.doi.org/10.1016/S1352-2310(98)00006-5), 1998.
- 559 Anderson, T. L., Charlson, R. J., Winker, D. M., Ogren, J. A., and Holmén, K.: Mesoscale  
560 Variations of Tropospheric Aerosols, *Journal of the Atmospheric Sciences*, 60, 119-136, doi:  
561 [http://dx.doi.org/10.1175/1520-0469\(2003\)060<0119:MVOTA>2.0.CO;2](http://dx.doi.org/10.1175/1520-0469(2003)060<0119:MVOTA>2.0.CO;2), 2003.
- 562 Ångström, A.: The parameters of atmospheric turbidity, *Tellus*, 16, 64-75, 10.1111/j.2153-  
563 3490.1964.tb00144.x, 1964.
- 564 Benjamini, Y., and Hochberg, Y.: Controlling the False Discovery Rate: A Practical and  
565 Powerful Approach to Multiple Testing, *Journal of the Royal Statistical Society. Series B*  
566 (Methodological), 57, 289-300, 1995.
- 567 Boucher, O., D. Randall, P. Artaxo, C. Bretherton, G. Feingold, P. Forster, V.-M. Kerminen,  
568 Y. Kondo, H. Liao, U. Lohmann, P. Rasch, S.K. Satheesh, S. Sherwood, B. Stevens and X.Y.  
569 Zhang: Clouds and Aerosols, in: *Climate Change 2013: The Physical Science Basis.*  
570 Contribution of Working Group I to the Fifth Assessment Report of the Intergovernmental  
571 Panel on Climate Change, edited by: Stocker, T. F., D. Qin, G.-K. Plattner, M. Tignor, S.K.  
572 Allen, J. Boschung, A. Nauels, Y. Xia, V. Bex and P.M. Midgley, Cambridge University  
573 Press, Cambridge, United Kingdom and New York, NY, USA, 33–115, 2013.



574 Brinksma, E. J., K. F. Boersma, P. F. Levelt, and R. D. McPeters OMI validation  
575 requirements document, Version 1, Rep. RS-OMIE-KNMI-345, 66, 2003.

576 Brock, C. A., Wagner, N. L., Anderson, B. E., Attwood, A. R., Beyersdorf, A., Campuzano-  
577 Jost, P., Carlton, A. G., Day, D. A., Diskin, G. S., Gordon, T. D., Jimenez, J. L., Lack, D. A.,  
578 Liao, J., Markovic, M. Z., Middlebrook, A. M., Ng, N. L., Perring, A. E., Richardson, M. S.,  
579 Schwarz, J. P., Washenfelder, R. A., Welti, A., Xu, L., Ziemba, L. D., and Murphy, D. M.:  
580 Aerosol optical properties in the southeastern United States in summer – Part 1: Hygroscopic  
581 growth, *Atmos. Chem. Phys.*, 16, 25695-25738, doi:10.5194/acp-16-5009-2016, 2016.

582 Chance, K.: OMI algorithm theoretical basis document, volume IV: OMI trace gas  
583 algorithms, 2002.

584 Chen, F., and Dudhia, J.: Coupling an advanced land surface–hydrology model with the Penn  
585 State–NCAR MM5 modeling system. Part I: model implementation and sensitivity, *Monthly*  
586 *Weather Review*, 129, 569-585, doi:10.1175/1520-  
587 0493(2001)129<0569:CAALSH>2.0.CO;2, 2001.

588 Chin, M., Kahn, R. A., and Schwartz, S. E.: Atmospheric Aerosols Properties and Climate  
589 Impacts. A Report by the U.S. Climate Change Science Program and the Subcommittee on  
590 Global Change Research, in, National Aeronautics and Space Administration, Washington,  
591 D.C., USA, 128, 2009.

592 Crippa, P., Sullivan, R. C., Thota, A., and Pryor, S. C.: Evaluating the skill of high-resolution  
593 WRF-Chem simulations in describing drivers of aerosol direct climate forcing on the regional  
594 scale, *Atmos. Chem. Phys.*, 16, 397-416, 10.5194/acp-16-397-2016, 2016.

595 Di Luca, A., de Elía, R., and Laprise, R.: Challenges in the Quest for Added Value of  
596 Regional Climate Dynamical Downscaling, *Curr Clim Change Rep*, 1, 10-21,  
597 10.1007/s40641-015-0003-9, 2015.

598 Diaconescu, E., and Laprise, R.: Can added value be expected in RCM-simulated large  
599 scales?, *Clim Dyn*, 41, 1769-1800, 10.1007/s00382-012-1649-9, 2013.

600 Emmons, L. K., Walters, S., Hess, P. G., Lamarque, J. F., Pfister, G. G., Fillmore, D.,  
601 Granier, C., Guenther, A., Kinnison, D., Laepple, T., Orlando, J., Tie, X., Tyndall, G.,  
602 Wiedinmyer, C., Baughcum, S. L., and Kloster, S.: Description and evaluation of the Model  
603 for Ozone and Related chemical Tracers, version 4 (MOZART-4), *Geoscientific Model*  
604 *Development*, 3, 43-67, doi:10.5194/gmd-3-43-2010, 2010.

605 Fast, J. D., Gustafson, W. I., Easter, R. C., Zaveri, R. A., Barnard, J. C., Chapman, E. G.,  
606 Grell, G. A., and Peckham, S. E.: Evolution of ozone, particulates, and aerosol direct  
607 radiative forcing in the vicinity of Houston using a fully coupled meteorology-chemistry-  
608 aerosol model, *Journal of Geophysical Research: Atmospheres*, 111, D21305,  
609 10.1029/2005JD006721, 2006.

610 Fioletov, V. E., McLinden, C. A., Krotkov, N., Moran, M. D., and Yang, K.: Estimation of  
611 SO<sub>2</sub> emissions using OMI retrievals, *Geophysical Research Letters*, 38, L21811,  
612 10.1029/2011GL049402, 2011.

613 Flores, J. M., Bar-Or, R. Z., Bluvshstein, N., Abo-Riziq, A., Kostinski, A., Borrmann, S.,  
614 Koren, I., Koren, I., and Rudich, Y.: Absorbing aerosols at high relative humidity: linking

615 hygroscopic growth to optical properties, *Atmospheric Chemistry and Physics*, 12, 5511-  
616 5521, 10.5194/acp-12-5511-2012, 2012.

617 Grell, G. A., and Dévényi, D.: A generalized approach to parameterizing convection  
618 combining ensemble and data assimilation techniques, *Geophysical Research Letters*, 29, 38-  
619 31-38-34, 10.1029/2002GL015311, 2002.

620 Grell, G. A., Peckham, S. E., Schmitz, R., McKeen, S. A., Frost, G., Skamarock, W. C., and  
621 Eder, B.: Fully coupled "online" chemistry within the WRF model, *Atmos. Environ.*, 39,  
622 6957-6975, 10.1016/j.atmosenv.2005.04.027, 2005.

623 Guenther, A., Zimmerman, P., and Wildermuth, M.: Natural volatile organic compound  
624 emission rate estimates for U.S. woodland landscapes, *Atmos. Environ.*, 28, 1197-1210,  
625 10.1016/1352-2310(94)90297-6, 1994.

626 Guenther, A. B., Zimmerman, P. R., Harley, P. C., Monson, R. K., and Fall, R.: Isoprene and  
627 monoterpene emission rate variability: model evaluations and sensitivity analyses, *J.*  
628 *Geophys. Res.-Atmos.*, 98, 12609-12617, 10.1029/93jd00527, 1993.

629 Gustafson, W. I., Qian, Y., and Fast, J. D.: Downscaling aerosols and the impact of neglected  
630 subgrid processes on direct aerosol radiative forcing for a representative global climate model  
631 grid spacing, *Journal of Geophysical Research: Atmospheres*, 116, D13303,  
632 10.1029/2010JD015480, 2011.

633 Hong, S.-Y., Dudhia, J., and Chen, S.-H.: A Revised Approach to Ice Microphysical  
634 Processes for the Bulk Parameterization of Clouds and Precipitation, *Monthly Weather*  
635 *Review*, 132, 103-120, doi:10.1175/1520-0493(2004)132<0103:ARATIM>2.0.CO;2, 2004.

636 Hyer, E. J., Reid, J. S., and Zhang, J.: An over-land aerosol optical depth data set for data  
637 assimilation by filtering, correction, and aggregation of MODIS Collection 5 optical depth  
638 retrievals, *Atmospheric Measurement Techniques*, 4, 379-408, 10.5194/amt-4-379-2011,  
639 2011.

640 Janjić, Z. I.: The Step-Mountain Eta Coordinate Model: Further Developments of the  
641 Convection, Viscous Sublayer, and Turbulence Closure Schemes, *Monthly Weather Review*,  
642 122, 927-945, doi:10.1175/1520-0493(1994)122<0927:TSMECM>2.0.CO;2, 1994.

643 Janjić, Z. I.: Nonsingular implementation of the Mellor–Yamada level 2.5 scheme in the  
644 NCEP Meso model, NCEP office note, 437, 61, 2002.

645 Jordan, N. S., Hoff, R. M., and Bacmeister, J. T.: Validation of Goddard Earth Observing  
646 System-version 5 MERRA planetary boundary layer heights using CALIPSO, *J. Geophys.*  
647 *Res.-Atmos.*, 115, 10.1029/2009jd013777, 2010.

648 Krotkov, N. A., McClure, B., Dickerson, R. R., Carn, S. A., Li, C., Bhartia, P. K., Yang, K.,  
649 Krueger, A. J., Li, Z., Levelt, P. F., Chen, H., Wang, P., and Lu, D.: Validation of SO<sub>2</sub>  
650 retrievals from the Ozone Monitoring Instrument over NE China, *Journal of Geophysical*  
651 *Research: Atmospheres*, 113, D16S40, 10.1029/2007JD008818, 2008.

652 Leibensperger, E., Mickley, L. J., Jacob, D. J., Chen, W.-T., Seinfeld, J., Nenes, A., Adams,  
653 P., Streets, D., Kumar, N., and Rind, D.: Climatic effects of 1950–2050 changes in US



654 anthropogenic aerosols–Part 1: Aerosol trends and radiative forcing, *Atmospheric Chemistry*  
655 *and Physics*, 12, 3333-3348, doi:10.5194/acp-12-3333-2012, 2012.

656 Levy, R. C., Mattoo, S., Munchak, L. A., Remer, L. A., Sayer, A. M., Patadia, F., and Hsu, N.  
657 C.: The Collection 6 MODIS aerosol products over land and ocean, *Atmospheric*  
658 *Measurement Techniques*, 6, 2989-3034, 10.5194/amt-6-2989-2013, 2013.

659 Long, M., Yantosca, R., Nielsen, J., Keller, C., da Silva, A., Sulprizio, M., Pawson, S., and  
660 Jacob, D.: Development of a grid-independent GEOS-Chem chemical transport model (v9-  
661 02) as an atmospheric chemistry module for Earth system models, *Geoscientific Model*  
662 *Development*, 8, 595-602, doi:10.5194/gmd-8-595-2015, 2015.

663 Mann, G. W., Carslaw, K. S., Ridley, D. A., Spracklen, D. V., Pringle, K. J., Merikanto, J.,  
664 Korhonen, H., Schwarz, J. P., Lee, L. A., Manktelow, P. T., Woodhouse, M. T., Schmidt, A.,  
665 Breider, T. J., Emmerson, K. M., Reddington, C. L., Chipperfield, M. P., and Pickering, S. J.:  
666 Intercomparison of modal and sectional aerosol microphysics representations within the same  
667 3-D global chemical transport model, *Atmospheric Chemistry and Physics*, 12, 4449-4476,  
668 10.5194/acp-12-4449-2012, 2012.

669 Martin, S. T., Hung, H. M., Park, R. J., Jacob, D. J., Spurr, R. J. D., Chance, K. V., and Chin,  
670 M.: Effects of the physical state of tropospheric ammonium-sulfate-nitrate particles on global  
671 aerosol direct radiative forcing, *Atmospheric Chemistry and Physics*, 4, 183-214,  
672 doi:10.5194/acp-4-183-2004, 2004.

673 McComiskey, A., Schwartz, S. E., Schmid, B., Guan, H., Lewis, E. R., Ricchiazzi, P., and  
674 Ogren, J. A.: Direct aerosol forcing: Calculation from observables and sensitivities to inputs,  
675 *Journal of Geophysical Research: Atmospheres*, 113, D09202, 10.1029/2007JD009170, 2008.

676 McLinden, C. A., Fioletov, V., Boersma, K. F., Kharol, S. K., Krotkov, N., Lamsal, L.,  
677 Makar, P. A., Martin, R. V., Veefkind, J. P., and Yang, K.: Improved satellite retrievals of  
678 NO<sub>2</sub> and SO<sub>2</sub> over the Canadian oil sands and comparisons with surface measurements,  
679 *Atmos. Chem. Phys.*, 14, 3637-3656, 10.5194/acp-14-3637-2014, 2014.

680 Meehl, G. A., Moss, R., Taylor, K. A., Eyring, V., Stouffer, R. J., Sandrine, B., and Stevens,  
681 B.: Climate model intercomparisons: preparing for the next phase, *Eos, Transaction,*  
682 *American Geophysical Union*, 95, 77-84, doi:10.1002/2014EO09, 2014.

683 Misenis, C., and Zhang, Y.: An examination of sensitivity of WRF/Chem predictions to  
684 physical parameterizations, horizontal grid spacing, and nesting options, *Atmospheric*  
685 *Research*, 97, 315-334, 10.1016/j.atmosres.2010.04.005, 2010.

686 Mlawer, E. J., Taubman, S. J., Brown, P. D., Iacono, M. J., and Clough, S. A.: Radiative  
687 transfer for inhomogeneous atmospheres: RRTM, a validated correlated-k model for the  
688 longwave, *Journal of Geophysical Research: Atmospheres*, 102, 16663-16682,  
689 10.1029/97JD00237, 1997.

690 Molod, A., Takacs, L., Suarez, M., and Bacmeister, J.: Development of the GEOS-5  
691 atmospheric general circulation model: evolution from MERRA to MERRA2, *Geoscientific*  
692 *Model Development*, 8, 1339-1356, 10.5194/gmd-8-1339-2015, 2015.

693 Murphy, A. H., and Epstein, E. S.: Skill scores and correlation-coefficients in model  
694 verification, *Monthly Weather Review*, 117, 572-581, 10.1175/1520-  
695 0493(1989)117<0572:ssacci>2.0.co;2, 1989.

696 Myhre, G., Samset, B. H., Schulz, M., Balkanski, Y., Bauer, S., Berntsen, T. K., Bian, H.,  
697 Bellouin, N., Chin, M., Diehl, T., Easter, R. C., Feichter, J., Ghan, S. J., Hauglustaine, D.,  
698 Iversen, T., Kinne, S., Kirkevåg, A., Lamarque, J. F., Lin, G., Liu, X., Lund, M. T., Luo, G.,  
699 Ma, X., van Noije, T., Penner, J. E., Rasch, P. J., Ruiz, A., Seland, O., Skeie, R. B., Stier, P.,  
700 Takemura, T., Tsigaridis, K., Wang, P., Wang, Z., Xu, L., Yu, H., Yu, F., Yoon, J. H., Zhang,  
701 K., Zhang, H., and Zhou, C.: Radiative forcing of the direct aerosol effect from AeroCom  
702 Phase II simulations, *Atmospheric Chemistry and Physics*, 13, 1853-1877, 10.5194/acp-13-  
703 1853-2013, 2013a.

704 Myhre, G., Shindell, D., Bréon, F.-M., Collins, W., Fuglestvedt, J., Huang, J., Koch, D.,  
705 Lamarque, J.-F., Lee, D., Mendoza, B., Nakajima, T., Robock, A., Stephens, G., Takemura,  
706 T., and Zhang, H.: Anthropogenic and Natural Radiative Forcing, in: *Climate Change 2013:  
707 The Physical Science Basis. Contribution of Working Group I to the Fifth Assessment Report  
708 of the Intergovernmental Panel on Climate Change*, edited by: Stocker, T. F., Qin, D.,  
709 Plattner, G.-K., Tignor, M., Allen, S. K., Boschung, J., Nauels, A., Xia, Y., Bex, V., and  
710 Midgley, P. M., Cambridge University Press, Cambridge, United Kingdom and New York,  
711 NY, USA, 659–740, 2013b.

712 Qian, Y., Gustafson Jr, W. I., and Fast, J. D.: An investigation of the sub-grid variability of  
713 trace gases and aerosols for global climate modeling, *Atmos. Chem. Phys.*, 10, 6917-6946,  
714 10.5194/acp-10-6917-2010, 2010.

715 Rissman, J., Arunachalam, S., Woody, M., West, J. J., BenDor, T., and Binkowski, F. S.: A  
716 plume-in-grid approach to characterize air quality impacts of aircraft emissions at the  
717 Hartsfield–Jackson Atlanta International Airport, *Atmos. Chem. Phys.*, 13, 9285-9302,  
718 10.5194/acp-13-9285-2013, 2013.

719 Rockel, B., Castro, C. L., Pielke, R. A., von Storch, H., and Leoncini, G.: Dynamical  
720 downscaling: Assessment of model system dependent retained and added variability for two  
721 different regional climate models, *Journal of Geophysical Research: Atmospheres*, 113,  
722 D21107, 10.1029/2007JD009461, 2008.

723 Santarpia, J. L., Gasparini, R., Li, R. J., and Collins, D. R.: Diurnal variations in the  
724 hygroscopic growth cycles of ambient aerosol populations, *J. Geophys. Res.-Atmos.*, 110,  
725 10.1029/2004jd005279, 2005.

726 Schell, B., Ackermann, I. J., Hass, H., Binkowski, F. S., and Ebel, A.: Modeling the  
727 formation of secondary organic aerosol within a comprehensive air quality model system, *J.  
728 Geophys. Res.-Atmos.*, 106, 28275-28293, 10.1029/2001jd000384, 2001.

729 Schuster, G. L., O. Dubovik, and B. N. Holben Angstrom exponent and bimodal aerosol size  
730 distributions, *J. Geophys. Res.-Atmos.*, 111, D07207, doi:10.1029/2005JD006328., 2006.

731 Seinfeld, J. H., and Pandis, S. N.: *Atmospheric chemistry and physics: from air pollution to  
732 climate change*, John Wiley & Sons, 1152 pp., 2016.

- 733 Simes, R. J.: An improved Bonferroni procedure for multiple tests of significance,  
734 *Biometrika*, 73, 751-754, 10.2307/2336545, 1986.
- 735 Simpson, D., Guenther, A., Hewitt, C. N., and Steinbrecher, R.: Biogenic emissions in  
736 Europe. 1. estimates and uncertainties, *J. Geophys. Res.-Atmos.*, 100, 22875-22890,  
737 10.1029/95jd02368, 1995.
- 738 Stocker, T. F. a. Q., D. and Plattner, G.-K. and Alexander, L.V. and Allen, S.K. and Bindoff,  
739 N.L. and Bréon, F.-M. and Church, J.A. and Cubasch, U. and Emori, S. and Forster, P. and  
740 Friedlingstein, P. and Gillett, N. and Gregory, J.M. and Hartmann, D.L. and Jansen, E. and  
741 Kirtman, B. and Knutti, R. and Krishna Kumar, K. and Lemke, P. and Marotzke, J. and  
742 Masson-Delmotte, V. and Meehl, G.A. and Mokhov, I.I. and Piao, S. and Ramaswamy, V.  
743 and Randall, D. and Rhein, M. and Rojas, M. and Sabine, C. and Shindell, D. and Talley,  
744 L.D. and Vaughan, D.G. and Xie, S.-P.: Summary for Policymakers, in: *Climate Change*  
745 *2013: The Physical Science Basis. Contribution of Working Group I to the Fifth Assessment*  
746 *Report of the Intergovernmental Panel on Climate Change*, Cambridge University Press,  
747 Cambridge, United Kingdom and New York, NY, USA, 33–115, 2013.
- 748 Stockwell, W. R., Middleton, P., Chang, J. S., and Tang, X.: The second generation regional  
749 acid deposition model chemical mechanism for regional air quality modeling, *Journal of*  
750 *Geophysical Research: Atmospheres*, 95, 16343-16367, 10.1029/JD095iD10p16343, 1990.
- 751 Taylor, K. E.: Summarizing multiple aspects of model performance in a single diagram, *J.*  
752 *Geophys. Res.-Atmos.*, 106, 7183-7192, 10.1029/2000jd900719, 2001.
- 753 Tilmes, S., Lamarque, J.-F., Emmons, L., Kinnison, D., Ma, P.-L., Liu, X., Ghan, S.,  
754 Bardeen, C., Arnold, S., and Deeter, M.: Description and evaluation of tropospheric  
755 chemistry and aerosols in the Community Earth System Model (CESM1. 2), *Geoscientific*  
756 *Model Development*, 8, 1395-1426, doi:10.5194/gmd-8-1395-2015, 2015.
- 757 Tomasi, C., Caroli, E., and Vitale, V.: Study of the Relationship between Ångström's  
758 Wavelength Exponent and Junge Particle Size Distribution Exponent, *Journal of Climate and*  
759 *Applied Meteorology*, 22, 1707-1716, 10.1175/1520-  
760 0450(1983)022<1707:SOTRBW>2.0.CO;2, 1983.
- 761 US-EPA: 2005 National Emissions Inventory (NEI), US Environmental Protection Agency  
762 in, available at: [ftp://aftp.fsl.noaa.gov/divisions/taq/emissions\\_data\\_2005/](ftp://aftp.fsl.noaa.gov/divisions/taq/emissions_data_2005/), 2009.
- 763 Vinken, G. C. M., Boersma, K. F., van Donkelaar, A., and Zhang, L.: Constraints on ship  
764 NO<sub>x</sub> emissions in Europe using GEOS-Chem and OMI satellite NO<sub>2</sub> observations, *Atmos.*  
765 *Chem. Phys.*, 14, 1353-1369, 10.5194/acp-14-1353-2014, 2014.
- 766 von Engel, A., and Teixeira, J.: A Planetary Boundary Layer Height Climatology Derived  
767 from ECMWF Reanalysis Data, *Journal of Climate*, 26, 6575–6590, doi: 10.1175/JCLI-D-12-  
768 00385.1, 2013.
- 769 Weigum, N., Schutgens, N., and Stier, P.: Effect of aerosol sub-grid variability on aerosol  
770 optical depth and cloud condensation nuclei: Implications for global aerosol modelling,  
771 *Atmos. Chem. Phys. Discuss.*, 2016, 1-36, 10.5194/acp-2016-360, 2016.
- 772 Whitburn, S., Van Damme, M., Clarisse, L., Bauduin, S., Heald, C., Hadji-Lazaro, J.,  
773 Hurtmans, D., Zondlo, M. A., Clerbaux, C., Coheur, P.-F. : A flexible and robust neural

774 network IASI-NH<sub>3</sub> retrieval algorithm, *J. Geophys. Res. Atmos.*, In Press,  
775 10.1002/2016JD024828, 2016.

776 Wild, O., Zhu, X., and Prather, M. J.: Fast-J: Accurate Simulation of In- and Below-Cloud  
777 Photolysis in Tropospheric Chemical Models, *Journal of Atmospheric Chemistry*, 37, 245-  
778 282, 10.1023/a:1006415919030, 2000.

779 Zhang, Y., Dubey, M. K., Olsen, S. C., Zheng, J., and Zhang, R.: Comparisons of  
780 WRF/Chem simulations in Mexico City with ground-based RAMA measurements during the  
781 2006-MILAGRO, *Atmospheric Chemistry and Physics*, 9, 3777-3798, doi:10.5194/acp-9-  
782 3777-2009, 2009.

783 Zieger, P., Fierz-Schmidhauser, R., Weingartner, E., and Baltensperger, U.: Effects of  
784 relative humidity on aerosol light scattering: results from different European sites,  
785 *Atmospheric Chemistry and Physics*, 13, 10609-10631, 10.5194/acp-13-10609-2013, 2013.

786

787

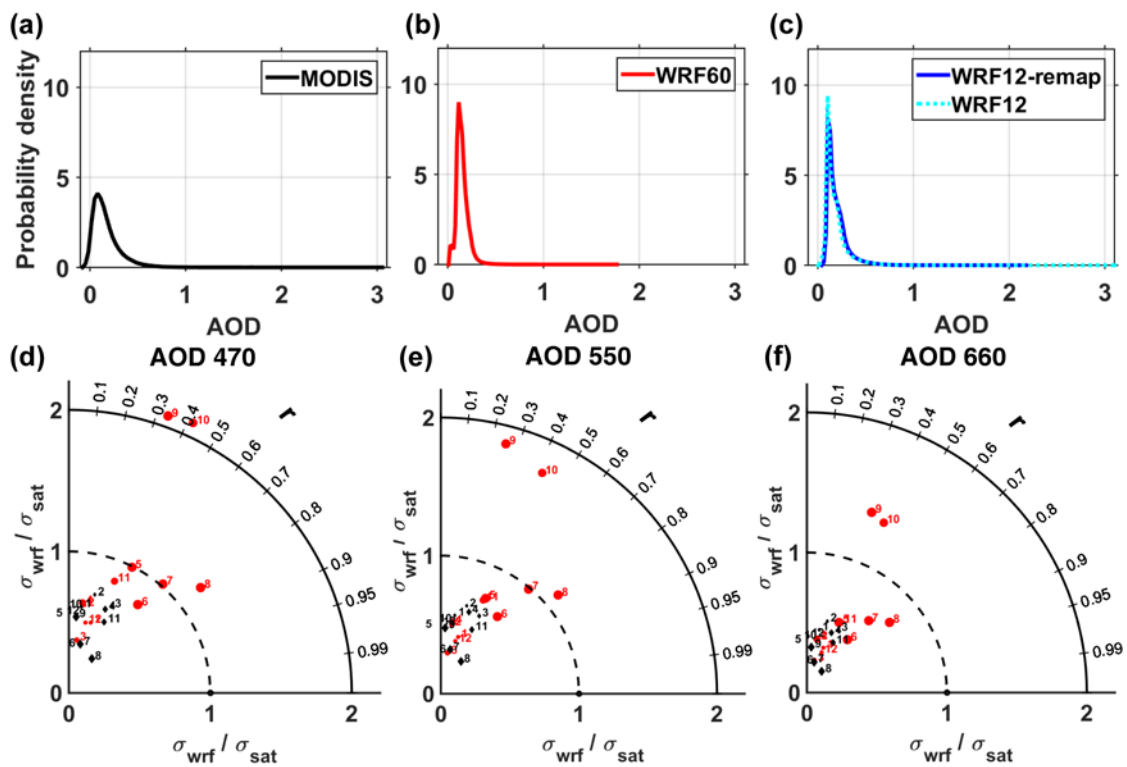

791 **Figure 1. Probability density function of once daily AOD at a wavelength ( $\lambda$ ) of 550 nm**  
 792 **for (a) MODIS, (b) WRF60 and (c) WRF12 and WRF12-remap during the year 2008.**  
 793 **(d-f) Taylor diagrams of mean monthly AOD at wavelengths ( $\lambda$ ) of (d) 470, (e) 550 and**  
 794 **(f) 660 nm as simulated by WRF-Chem at different resolutions (black**  
 795 **diamonds=WRF60 and red dots=WRF12-remap) relative to MODIS observations. The**  
 796 **numbers by each symbol denote the calendar month (e.g. 1=January).**

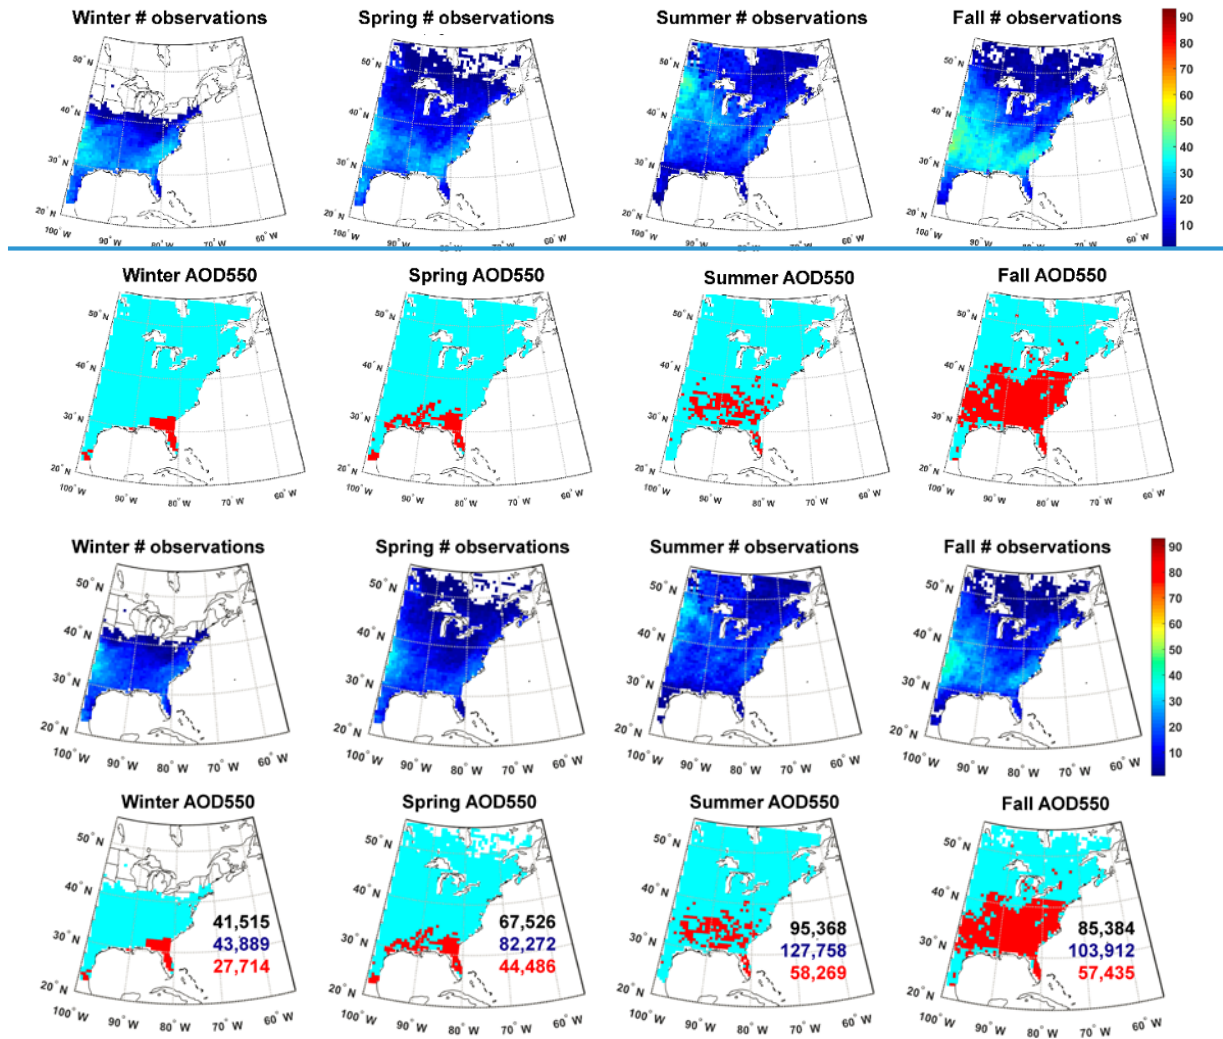

798

799

800 **Figure 2. First line: Number of paired AOD observations at a wavelength ( $\lambda$ ) of 550 nm**  
 801 **(i.e. simultaneous values as output from WRF-Chem and observed by MODIS) used to**  
 802 **perform a t-test designed to evaluate whether the difference computed for each grid cell**  
 803 **as WRF60-MODIS differs from that computed as WRF12-remap-MODIS on a seasonal**  
 804 **basis (columns show Winter (DJF), Spring (MAM), Summer (JJA) and Fall (SON)).**  
 805 **Second line: Results of the t-test. Pixels that have p-values that are significantly**  
 806 **different at  $\alpha=0.10$  are indicated in red and have been corrected for multiple testing**  
 807 **using a False Discovery Rate approach. The number of observations of cloud-free**  
 808 **conditions summed across all days in each season and all grid cells is also reported**  
 809 **(black=MODIS, blue=WRF60, red=WRF12-remap).**

810

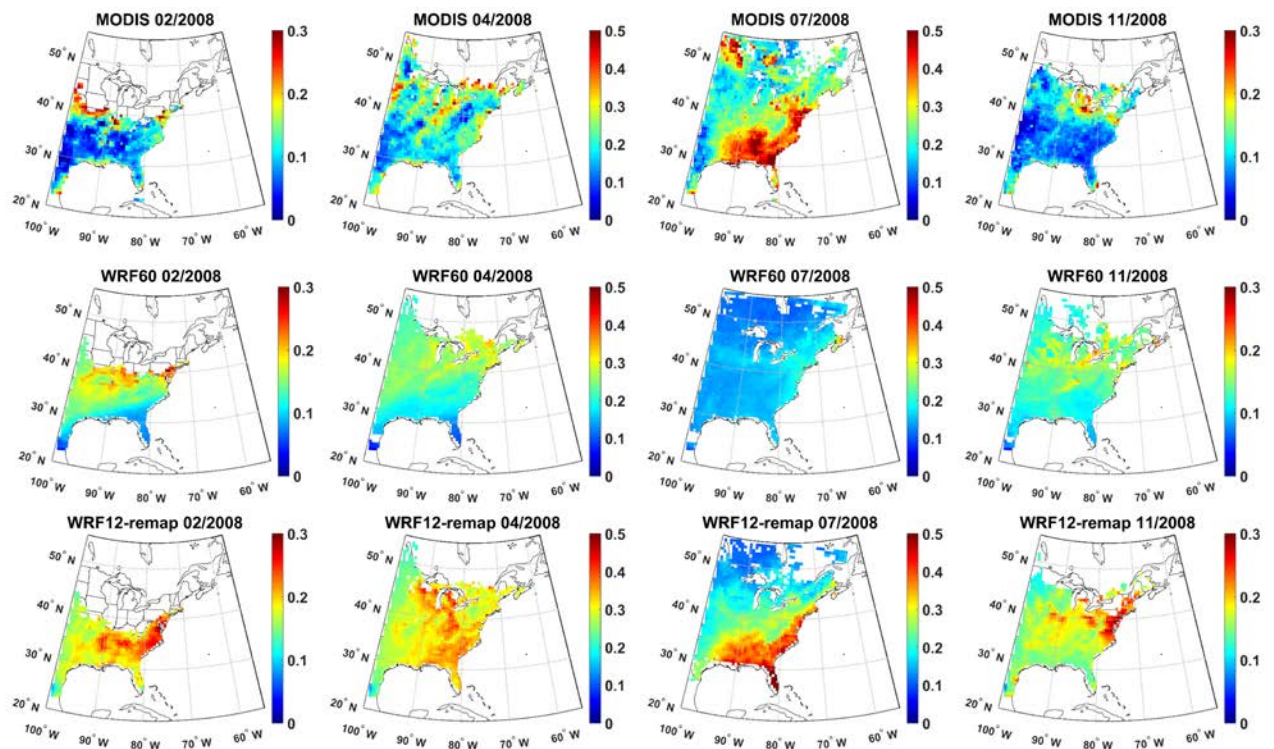

811

812 **Figure 3. Monthly mean AOD at a wavelength ( $\lambda$ ) of 550 nm from MODIS (first line)**  
 813 **and WRF-Chem at different resolutions (WRF60 and WRF12-remap, second and third**  
 814 **line) during a representative month in each climatological season (columns). Note that a**  
 815 **different color scale is applied for different months. For a monthly mean value for a**  
 816 **grid cell to be shown, there must be at least 5-simultaneous daily values (for the time of**  
 817 **the satellite overpass) available.**

818



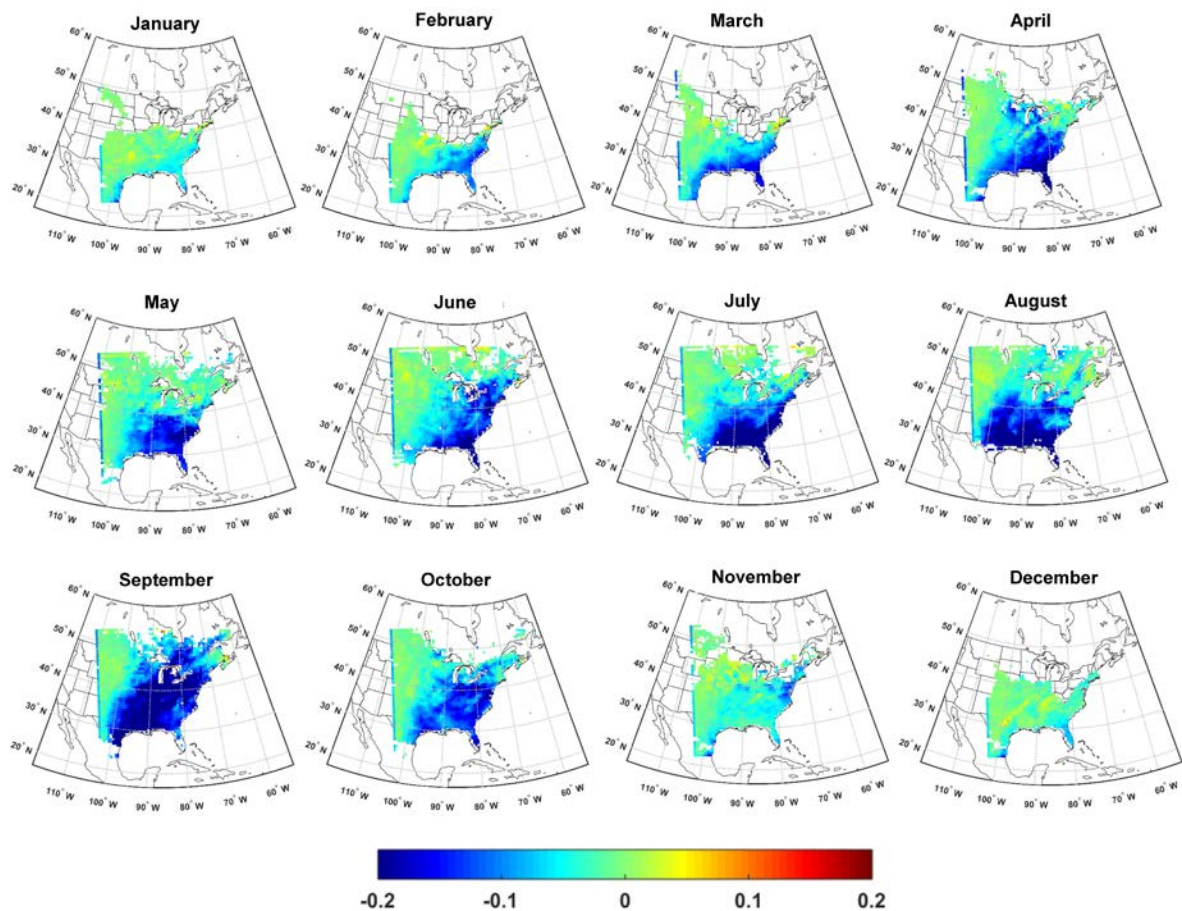

819

820 **Figure 4. Difference in monthly mean AOD at a wavelength ( $\lambda$ ) of 550 nm between**  
 821 **WRF-Chem simulations conducted at 60 km resolution (WRF60) and output from**  
 822 **WRF-Chem simulations conducted with a resolution of 12 km but remapped to 60 km**  
 823 **(WRF12-remap). Differences are computed as WRF60 minus WRF12-remap. Similar**  
 824 **spatial patterns and magnitudes of differences are found for  $\lambda$  of 470 and 660 nm. The**  
 825 **calendar months of 2008 are shown in the titles of each panel.**

826



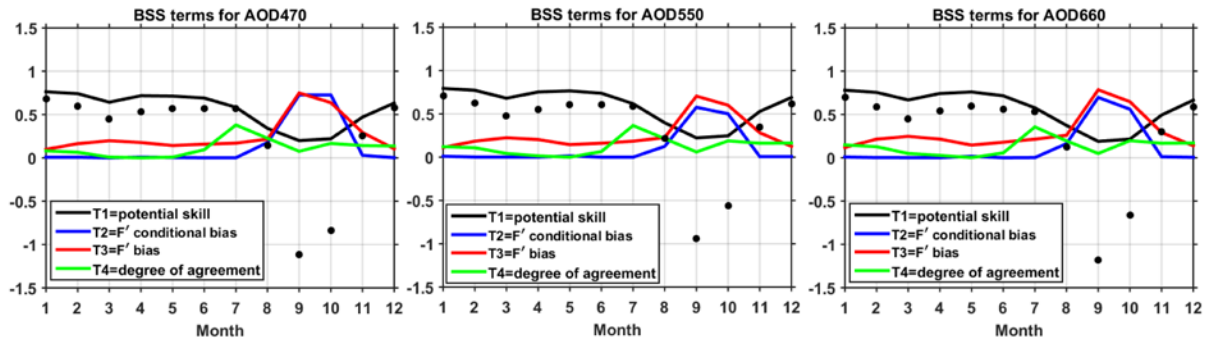

827

828 **Figure 5. Brier Skill Scores (BSS, black dots) for monthly mean AOD by calendar**  
 829 **month (1=January) for AOD at 470, 550 and 660 nm. In this analysis of model skill**  
 830 **WRF12 output is mapped to the WRF60 grid (WRF12-remap) and BSS are computed**  
 831 **using MODIS as the target, WRF60 as the reference forecast and WRF12-remap as the**  
 832 **forecast. Also shown by the color lines are the contributions of different terms to BSS.**

833

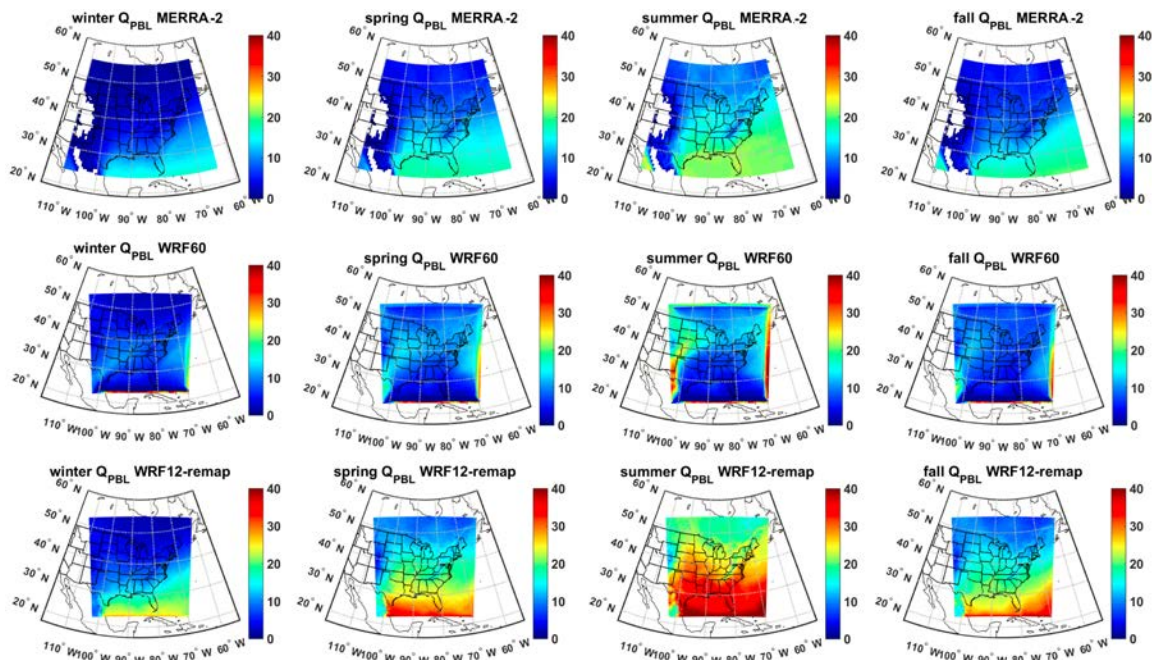

834

835 **Figure 6. Seasonal mean specific humidity [ $\text{kg m}^{-2}$ ] integrated from the surface to 825**  
 836  **$\text{hPa}$  ( $Q_{PBL}$ ) from MERRA-2 (first row) assuming an average air density in the  $PBL$  of**  
 837  **$1.1 \text{ kg m}^{-3}$ , WRF60 (second row), and WRF12-remap (third row). The data are 3-hourly**  
 838 **and show only cloud-free hours in all three data sets.**

839

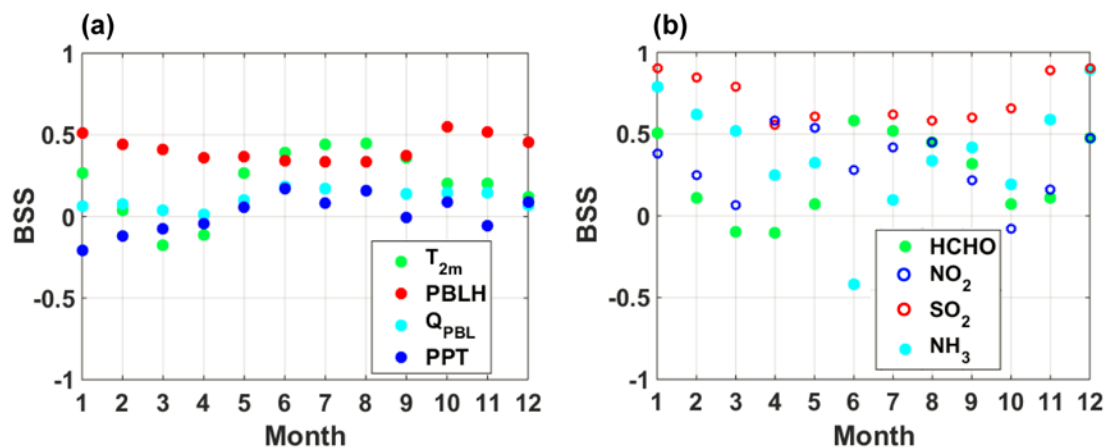

840

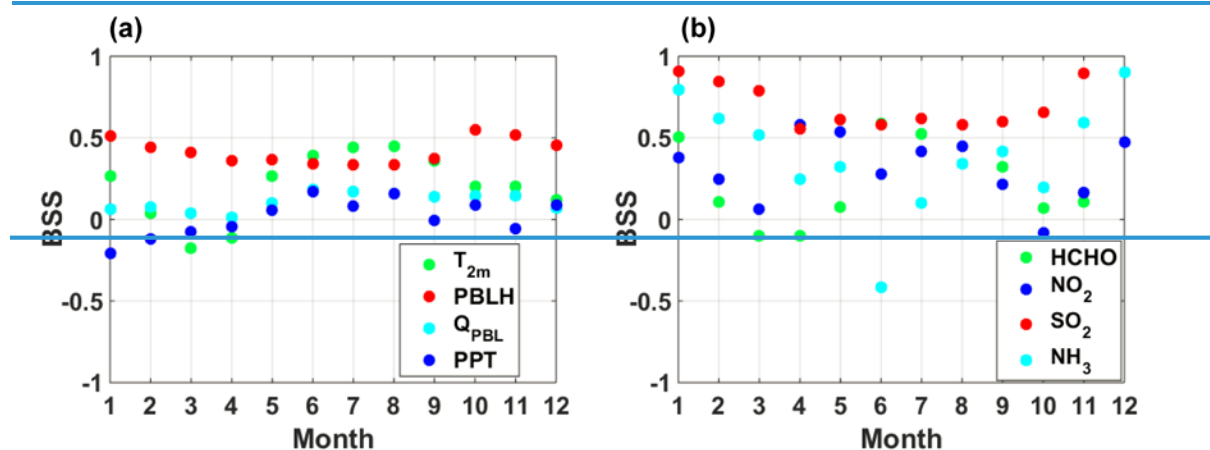

841

842 **Figure 7. Brier Skill Scores (BSS) for key (a) meteorological and (b) chemical variables.**  
 843 **BSS are computed using hourly data of T at 2m ( $T_{2m}$ ) and PBLH, 3-hourly estimates of**  
 844 **specific humidity in the boundary layer ( $Q_{PBL}$ ), and z-scores of monthly total**  
 845 **precipitation (PPT), and of monthly mean columnar gas phase concentrations.**

846

847

849 **Table 1. Physical and chemical schemes adopted in the WRF-Chem simulations**  
 850 **presented herein.**

| <b><u>Simulation settings</u></b> | <b><u>Values</u></b>                                                                                                  |
|-----------------------------------|-----------------------------------------------------------------------------------------------------------------------|
| <u>Domain size</u>                | <u>300 × 300 (60 × 60) grid points</u>                                                                                |
| <u>Horizontal resolution</u>      | <u>12 km (60 km)</u>                                                                                                  |
| <u>Vertical resolution</u>        | <u>32 levels up to 50 hPa</u>                                                                                         |
| <u>Timestep for physics</u>       | <u>72 s (300 s)</u>                                                                                                   |
| <u>Timestep for chemistry</u>     | <u>5 s</u>                                                                                                            |
| <b><u>Physics option</u></b>      | <b><u>Adopted scheme</u></b>                                                                                          |
| <u>Microphysics</u>               | <u>WRF Single-Moment 5-class (Hong et al., 2004)</u>                                                                  |
| <u>Longwave Radiation</u>         | <u>Rapid Radiative Transfer Model (RRTM) (Mlawer et al., 1997)</u>                                                    |
| <u>Shortwave Radiation</u>        | <u>Goddard (Fast et al., 2006)(<del>Chou, 1994</del>){<del>Fast, 2006 #191</del>}</u>                                 |
| <u>Surface layer</u>              | <u>Monin Obhukov similarity (Janjić, 2002;Janjić, 1994)</u>                                                           |
| <u>Land Surface</u>               | <u>Noah Land Surface Model (Chen and Dudhia, 2001)</u>                                                                |
| <u>Planetary boundary layer</u>   | <u>Mellor-Yamada-Janjich (Janjić, 1994)</u>                                                                           |
| <u>Cumulus parameterizations</u>  | <u>Grell 3 (Grell and Dévényi, 2002)</u>                                                                              |
| <b><u>Chemistry option</u></b>    | <b><u>Adopted scheme</u></b>                                                                                          |
| <u>Photolysis</u>                 | <u>Fast J (Wild et al., 2000)</u>                                                                                     |
| <u>Gas-phase chemistry</u>        | <u>RADM2 (Stockwell et al., 1990)</u>                                                                                 |
| <u>Aerosols</u>                   | <u>MADE/SORGAM (Ackermann et al., 1998;Schell et al., 2001)</u>                                                       |
| <u>Anthropogenic emissions</u>    | <u>NEI (2005) (US-EPA, 2009)</u>                                                                                      |
| <u>Biogenic emissions</u>         | <u>Guenther, from USGS land use classification (Guenther et al., 1994;Guenther et al., 1993;Simpson et al., 1995)</u> |

851

852

853 **Table 2. Spearman correlation coefficients ( $\rho$ ) between AOD at wavelengths ( $\lambda$ ) of 470,**  
854 **550 and 660 nm from MODIS observations averaged over 12 or 60 km and WRF-Chem**  
855 **simulations conducted at 60 km (WRF60, shown in the table as -60), at 12 km (WRF12,**  
856 **shown in the table as -12), and from WRF-Chem simulations at 12 km but remapped to**  
857 **60 km (WRF12-remap, shown in the table as -remap). Given WRF12-remap is obtained**  
858 **by averaging WRF12 when at least half of the 5×5 12 km resolution cells contain valid**  
859 **data,  $\rho$  from WRF60 and WRF12-remap may be computed on slightly different**  
860 **observations and sample size. The bold text denotes correlation coefficients that are**  
861 **significant at  $\alpha=0.05$  after a Bonferroni correction is applied (i.e.**  
862  $p \leq \frac{0.05}{9 \times 12} = 4.63 \times 10^{-4}$  **is significant). The yellow shading is a visual guide that shows for**  
863 **each month and  $\lambda$  the model output that has highest  $\rho$  with MODIS.**

| Month→/<br>Variable↓ | Jan          | Feb          | Mar          | Apr          | May           | Jun           | Jul          | Aug          | Sep          | Oct           | Nov          | Dec          |
|----------------------|--------------|--------------|--------------|--------------|---------------|---------------|--------------|--------------|--------------|---------------|--------------|--------------|
| 470-12               | <b>0.238</b> | <b>0.150</b> | <b>0.137</b> | <b>0.147</b> | <b>0.377</b>  | <b>0.581</b>  | <b>0.610</b> | <b>0.723</b> | <b>0.352</b> | <b>0.306</b>  | <b>0.259</b> | <b>0.212</b> |
| 470-60               | 0.156        | <b>0.226</b> | <b>0.438</b> | <b>0.412</b> | <b>-0.219</b> | <b>-0.146</b> | <b>0.379</b> | <b>0.601</b> | 0.087        | -0.051        | <b>0.500</b> | -0.059       |
| 470-remap            | <b>0.295</b> | <b>0.197</b> | <b>0.250</b> | <b>0.182</b> | <b>0.516</b>  | <b>0.637</b>  | <b>0.675</b> | <b>0.777</b> | <b>0.368</b> | <b>0.441</b>  | <b>0.315</b> | <b>0.274</b> |
| 550-12               | <b>0.223</b> | <b>0.124</b> | <b>0.142</b> | <b>0.146</b> | <b>0.349</b>  | <b>0.541</b>  | <b>0.580</b> | <b>0.689</b> | <b>0.275</b> | <b>0.301</b>  | <b>0.280</b> | <b>0.215</b> |
| 550-60               | <b>0.179</b> | <b>0.244</b> | <b>0.429</b> | <b>0.332</b> | <b>-0.288</b> | <b>-0.188</b> | <b>0.324</b> | 0.567        | 0.073        | -0.077        | <b>0.491</b> | 0.002        |
| 550-remap            | <b>0.297</b> | 0.164        | <b>0.261</b> | <b>0.199</b> | <b>0.493</b>  | <b>0.605</b>  | <b>0.651</b> | <b>0.747</b> | <b>0.286</b> | <b>0.437</b>  | <b>0.352</b> | <b>0.309</b> |
| 660-12               | <b>0.217</b> | <b>0.136</b> | <b>0.165</b> | <b>0.152</b> | <b>0.324</b>  | <b>0.476</b>  | <b>0.540</b> | <b>0.644</b> | <b>0.183</b> | <b>0.290</b>  | <b>0.292</b> | <b>0.221</b> |
| 660-60               | <b>0.191</b> | <b>0.230</b> | <b>0.437</b> | <b>0.402</b> | <b>-0.305</b> | <b>-0.189</b> | <b>0.389</b> | <b>0.616</b> | 0.099        | <b>-0.137</b> | <b>0.536</b> | 0.049        |
| 660-remap            | <b>0.356</b> | <b>0.211</b> | <b>0.289</b> | <b>0.208</b> | <b>0.480</b>  | <b>0.624</b>  | <b>0.669</b> | <b>0.772</b> | <b>0.371</b> | <b>0.432</b>  | <b>0.393</b> | <b>0.368</b> |

864

865

866 **Table 3.** ~~Table 2.~~ Spatial coherence in the identification of extreme AOD values (i.e.  
867 areas with AOD > 75<sup>th</sup> percentile over space for each month) between WRF-Chem at  
868 different resolutions relative to MODIS. No significant wavelength dependence is found  
869 for model skill in identifying extreme AOD so results are only shown for  $\lambda = 550$  nm.  
870 The different model output is denoted by -60 for simulations at 60 km, -12 for  
871 simulations at 12 km resolution, and as -remap for simulations at 12 km but with the  
872 output remapped to 60 km. The *Accuracy* (Acc) indicates the fraction of grid cells co-  
873 identified as extremes and non-extremes between WRF-Chem and MODIS relative to  
874 the total number of cells with valid data. The *Hit Rate* (HR) is the probability of correct  
875 forecast and is the proportion of cells correctly identified as extremes by both WRF-  
876 Chem and MODIS. The yellow shading indicates the model resolution with highest skill  
877 in each month for AOD at 550 nm.

| Month→/<br>Metric↓ | Jan   | Feb   | Mar   | Apr   | May   | Jun   | Jul   | Aug   | Sep   | Oct   | Nov   | Dec   |
|--------------------|-------|-------|-------|-------|-------|-------|-------|-------|-------|-------|-------|-------|
| Acc-12             | 0.673 | 0.665 | 0.659 | 0.638 | 0.710 | 0.800 | 0.855 | 0.839 | 0.666 | 0.679 | 0.723 | 0.661 |
| Acc-60             | 0.707 | 0.778 | 0.735 | 0.730 | 0.600 | 0.587 | 0.658 | 0.769 | 0.661 | 0.637 | 0.729 | 0.681 |
| Acc-remap          | 0.674 | 0.680 | 0.694 | 0.640 | 0.766 | 0.824 | 0.887 | 0.837 | 0.667 | 0.699 | 0.767 | 0.641 |
| HR-12              | 0.346 | 0.331 | 0.319 | 0.275 | 0.421 | 0.599 | 0.711 | 0.678 | 0.333 | 0.358 | 0.447 | 0.323 |
| HR-60              | 0.417 | 0.558 | 0.471 | 0.460 | 0.200 | 0.173 | 0.315 | 0.538 | 0.321 | 0.274 | 0.458 | 0.364 |
| HR-remap           | 0.350 | 0.361 | 0.387 | 0.281 | 0.532 | 0.649 | 0.775 | 0.674 | 0.333 | 0.399 | 0.535 | 0.284 |

878  
879  
880  
881  
882  
883  
884  
885

**Supplementary Materials for the manuscript:**

**Value-added by high-resolution regional simulations of climate-relevant aerosol properties**

**P. Crippa<sup>1</sup>, R. C. Sullivan<sup>2</sup>, A. Thota<sup>3</sup>, S. C. Pryor<sup>2,3</sup>**

[1] COMET, School of Civil Engineering and Geosciences, Cassie Building, Newcastle University, Newcastle upon Tyne, NE1 7RU, UK

[2] Department of Earth and Atmospheric Sciences, Bradfield Hall, 306 Tower Road, Cornell University, Ithaca, NY 14853, USA

[3] Pervasive Technology Institute, Indiana University, Bloomington, IN 47405, USA

Table S1. Physical and chemical schemes adopted in the WRF-Chem simulations presented herein.

| <b>Simulation settings</b> | <b>Values</b>                               |
|----------------------------|---------------------------------------------|
| Domain size                | 300 × 300 (60 × 60) grid points             |
| Horizontal resolution      | 12 km (60 km)                               |
| Vertical resolution        | 32 levels up to 50 hPa                      |
| Timestep for physics       | 72 s (300 s)                                |
| Timestep for chemistry     | 5 s                                         |
| <b>Physics option</b>      | <b>Adopted scheme</b>                       |
| Microphysics               | WRF Single-Moment 5-class                   |
| Longwave Radiation         | Rapid Radiative Transfer Model (RRTM)       |
| Shortwave Radiation        | Goddard                                     |
| Surface layer              | Monin-Obhukov similarity                    |
| Land Surface               | Noah Land Surface Model                     |
| Planetary boundary layer   | Mellor-Yamada-Janjich                       |
| Cumulus parameterizations  | Grell 3                                     |
| <b>Chemistry option</b>    | <b>Adopted scheme</b>                       |
| Photolysis                 | Fast-J                                      |
| Gas-phase chemistry        | RADM2                                       |
| Aerosols                   | MADE/SORGAM                                 |
| Anthropogenic emissions    | NEI (2005)                                  |
| Biogenic emissions         | Guenther, from USGS land use classification |



Table S12. Ratio of spatial variability (i.e. the standard deviation of AOD computed across all grid cells) between AOD at wavelengths ( $\lambda$ ) of 470, 550 and 660 nm from MODIS observations mapped at 60 km and WRF-Chem simulations conducted at 60 km resolution (WRF60, shown in the table as -60), at 12 km resolution (WRF12, shown in the table as -12), and from WRF-Chem simulations at 12 km but remapped to 60 km (WRF12-remap, shown in the table as -remap). Given WRF12-remap is obtained by averaging WRF12 when at least half of the 5×5 12 km resolution cells contain valid data, the ratio of standard deviations from WRF60 and WRF12-remap may be computed on slightly different observations and sample size. The yellow shading shows for each month and  $\lambda$  the model with ratio of standard deviations closer to 1.

| Month→/<br>Variable↓ | Jan   | Feb   | Mar   | Apr   | May   | Jun   | Jul   | Aug   | Sep   | Oct   | Nov   | Dec   |
|----------------------|-------|-------|-------|-------|-------|-------|-------|-------|-------|-------|-------|-------|
| 470-12               | 0.489 | 0.581 | 0.382 | 0.595 | 0.806 | 0.802 | 1.033 | 1.20  | 1.935 | 1.698 | 0.766 | 0.457 |
| 470-60               | 0.615 | 0.717 | 0.682 | 0.648 | 0.556 | 0.331 | 0.353 | 0.291 | 0.541 | 0.605 | 0.562 | 0.564 |
| 470-remap            | 0.522 | 0.630 | 0.380 | 0.644 | 0.993 | 0.791 | 1.018 | 1.194 | 2.079 | 2.099 | 0.853 | 0.512 |
| 550-12               | 0.406 | 0.475 | 0.307 | 0.480 | 0.630 | 0.690 | 0.996 | 1.106 | 1.709 | 1.401 | 0.663 | 0.370 |
| 550-60               | 0.578 | 0.663 | 0.629 | 0.624 | 0.502 | 0.302 | 0.327 | 0.274 | 0.480 | 0.525 | 0.518 | 0.505 |
| 550-remap            | 0.431 | 0.503 | 0.299 | 0.524 | 0.764 | 0.693 | 0.990 | 1.110 | 1.872 | 1.758 | 0.745 | 0.396 |
| 660-12               | 0.401 | 0.454 | 0.283 | 0.462 | 0.571 | 0.671 | 1.004 | 1.114 | 1.684 | 1.343 | 0.665 | 0.351 |
| 660-60               | 0.458 | 0.531 | 0.497 | 0.462 | 0.378 | 0.214 | 0.225 | 0.184 | 0.328 | 0.391 | 0.402 | 0.405 |
| 660-remap            | 0.342 | 0.393 | 0.235 | 0.391 | 0.553 | 0.474 | 0.676 | 0.777 | 1.369 | 1.331 | 0.557 | 0.307 |

Table [S3S2](#). Spatial coherence in the identification of hourly precipitation between WRF-Chem at different resolutions relative to MERRA-2. The Hit Rate (*HR*) indicates the probability of correct forecast and is the proportion of cells correctly identified as with precipitation by both WRF-Chem and MERRA-2. The Mean Fractional Bias (MFB) in space is also reported for each month and computed from the hourly precipitation rates. The yellow shading indicates the model resolution with highest HR and lower absolute MFB in each month for precipitation.

| Month→/<br>Metric↓ | Jan    | Feb    | Mar    | Apr    | May    | Jun    | Jul    | Aug    | Sep    | Oct    | Nov    | Dec    |
|--------------------|--------|--------|--------|--------|--------|--------|--------|--------|--------|--------|--------|--------|
| HR-60              | 0.344  | 0.298  | 0.228  | 0.122  | 0.083  | 0.072  | 0.057  | 0.059  | 0.067  | 0.078  | 0.154  | 0.218  |
| HR-remap           | 0.698  | 0.715  | 0.680  | 0.539  | 0.402  | 0.440  | 0.479  | 0.438  | 0.438  | 0.454  | 0.581  | 0.666  |
| MFB-60             | -0.340 | -0.347 | -0.384 | -0.442 | -0.462 | -0.468 | -0.475 | -0.474 | -0.469 | -0.459 | -0.423 | -0.385 |
| MFB-12             | -0.095 | -0.068 | -0.065 | -0.168 | -0.273 | -0.269 | -0.260 | -0.274 | -0.281 | -0.261 | -0.170 | -0.119 |

Figure S1. Seasonal mean of hourly temperature at 2 meters [K] from MERRA-2 (first row), WRF60 (second row), and WRF12-remap (third row), for simultaneous data from all three datasets.

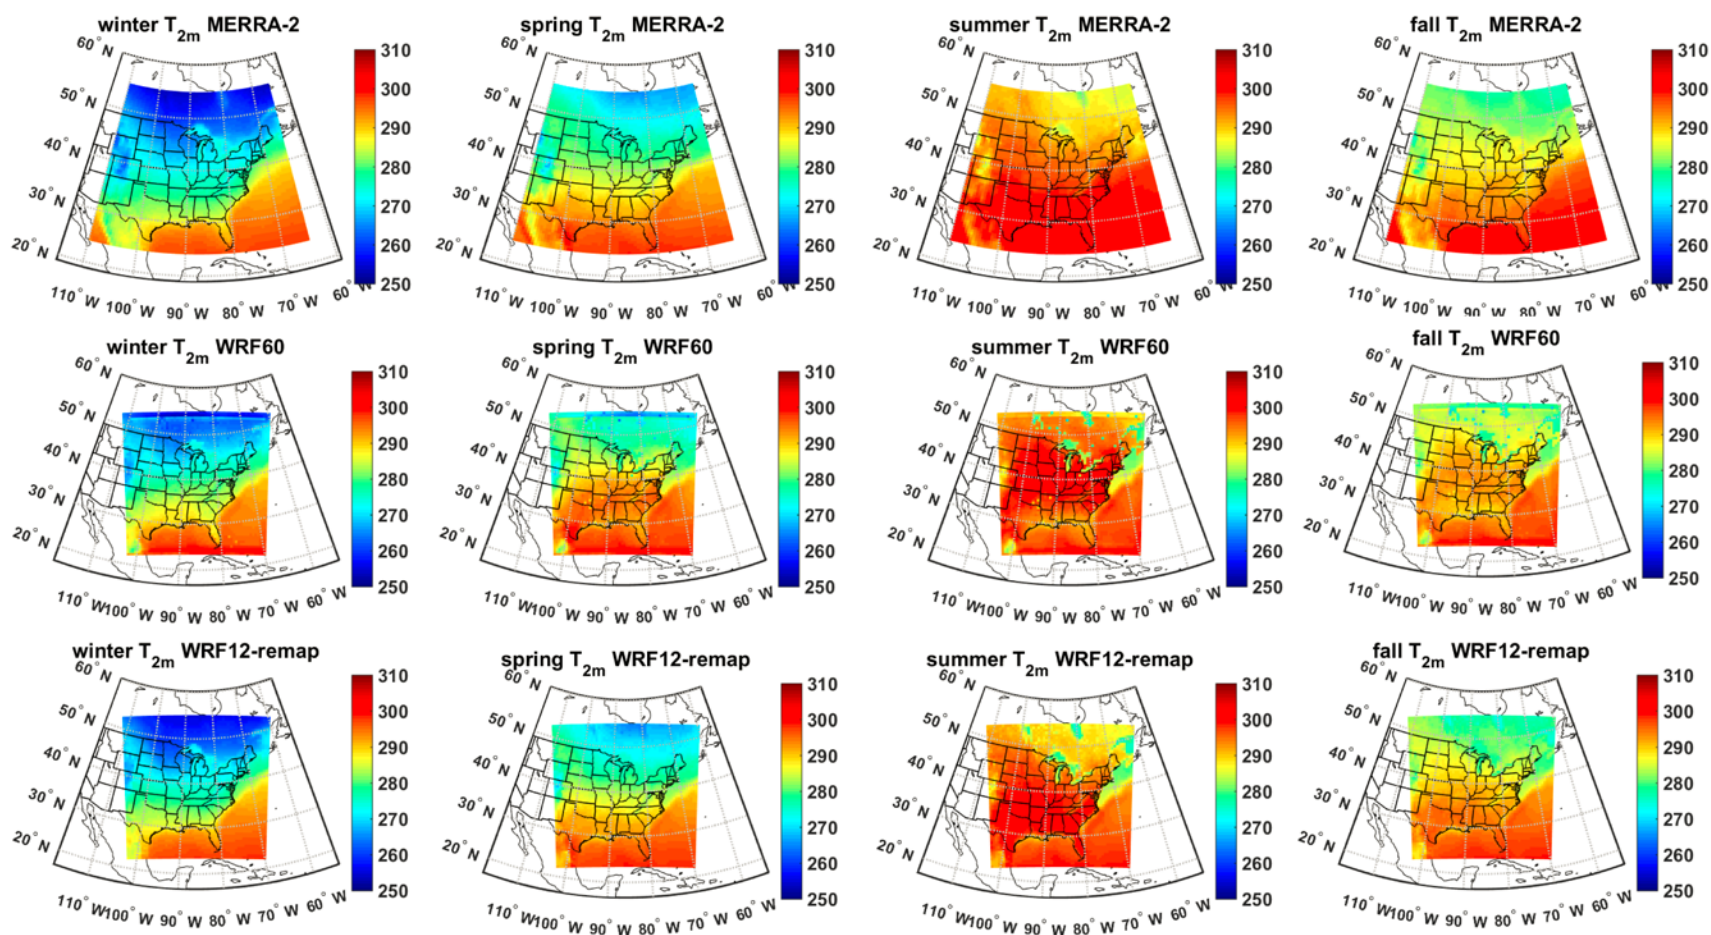

Figure S2. Seasonal average of hourly Planetary Boundary Layer Height,  $PBLH$  [m] from MERRA-2 (first row), WRF60 (second row), and WRF12-remap (third row), for simultaneous hours of the three datasets.

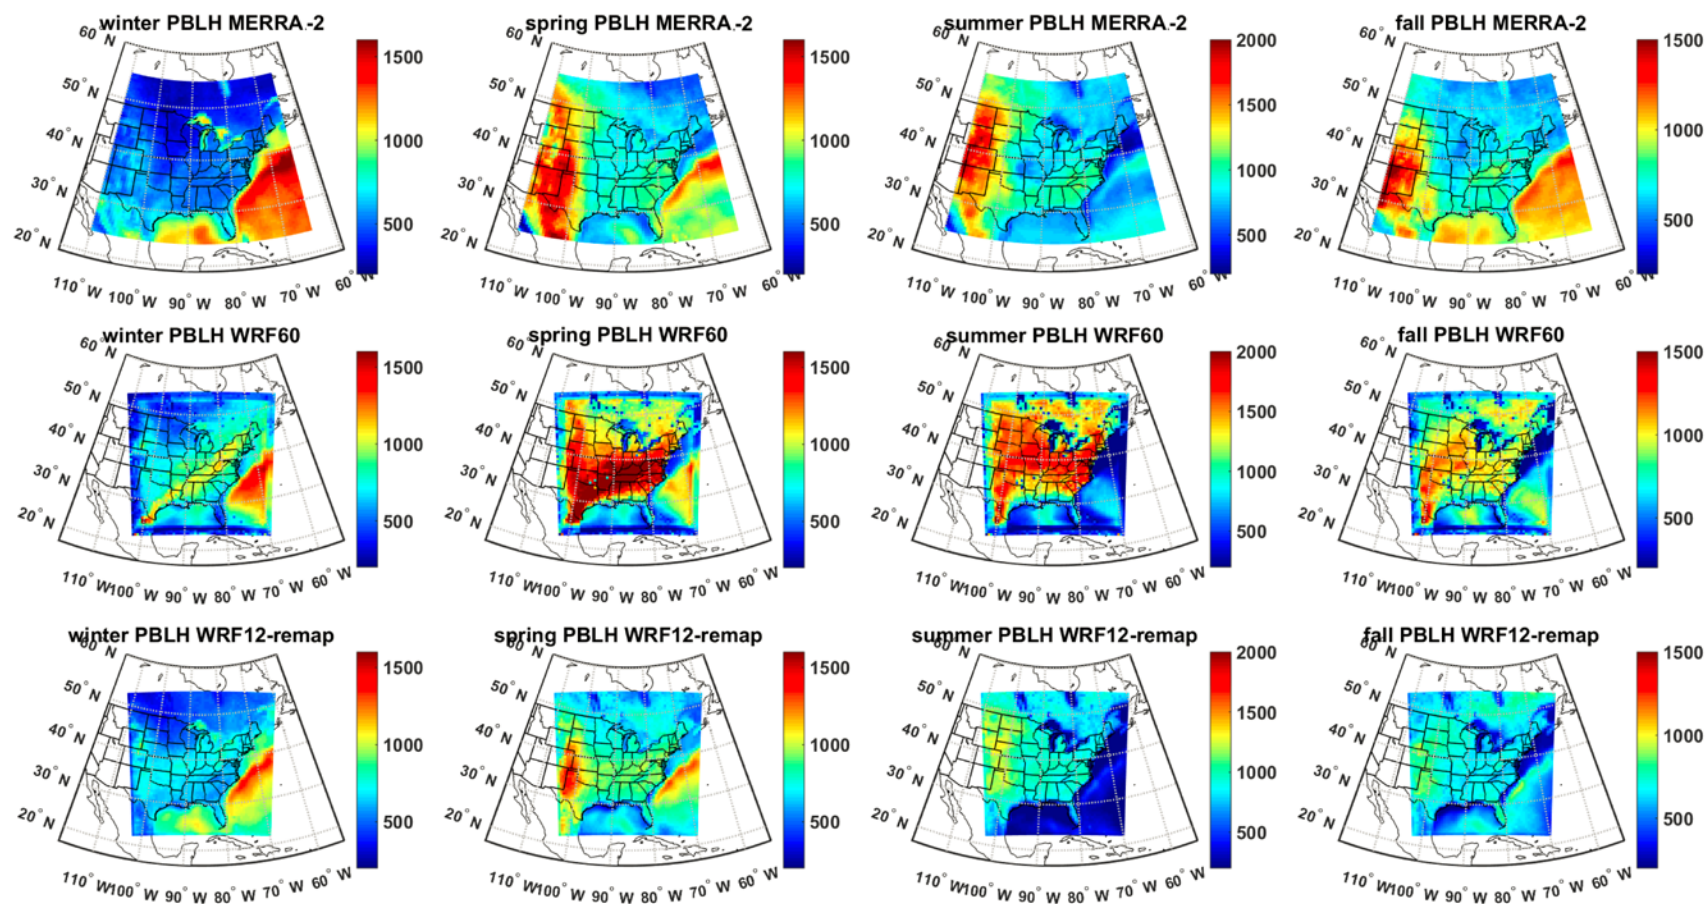



Figure S3. Seasonal total precipitation (mm) from MERRA-2 (first row), WRF60 (second row), and WRF12-remap (third row).

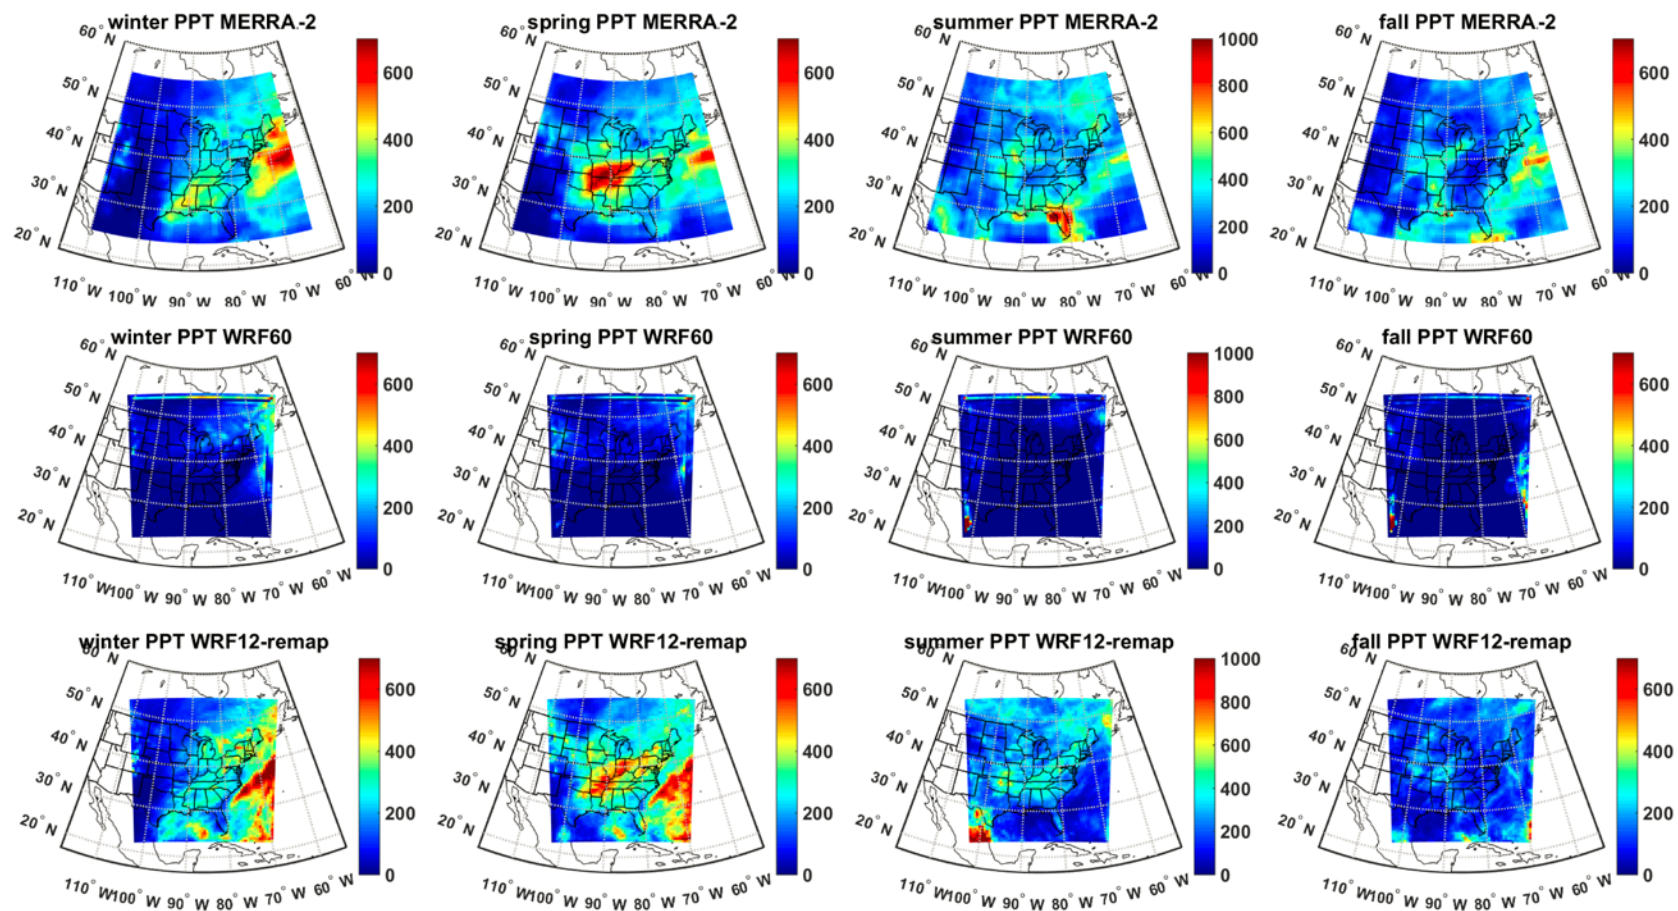

Figure S4. Seasonal total column SO<sub>2</sub> z-scores from OMI (first row), WRF60 (second row), and WRF12-remap (third row). z-scores are computed relative to the spatial seasonal mean of each dataset and indicate the distance from the mean in terms of standard deviation units. A cloud screen of 0.3 is applied to both satellite observations and simulated values. Only grid cells with at least 5 valid observations in a month are used to compute a mean value, otherwise the grid cell is shown as white.

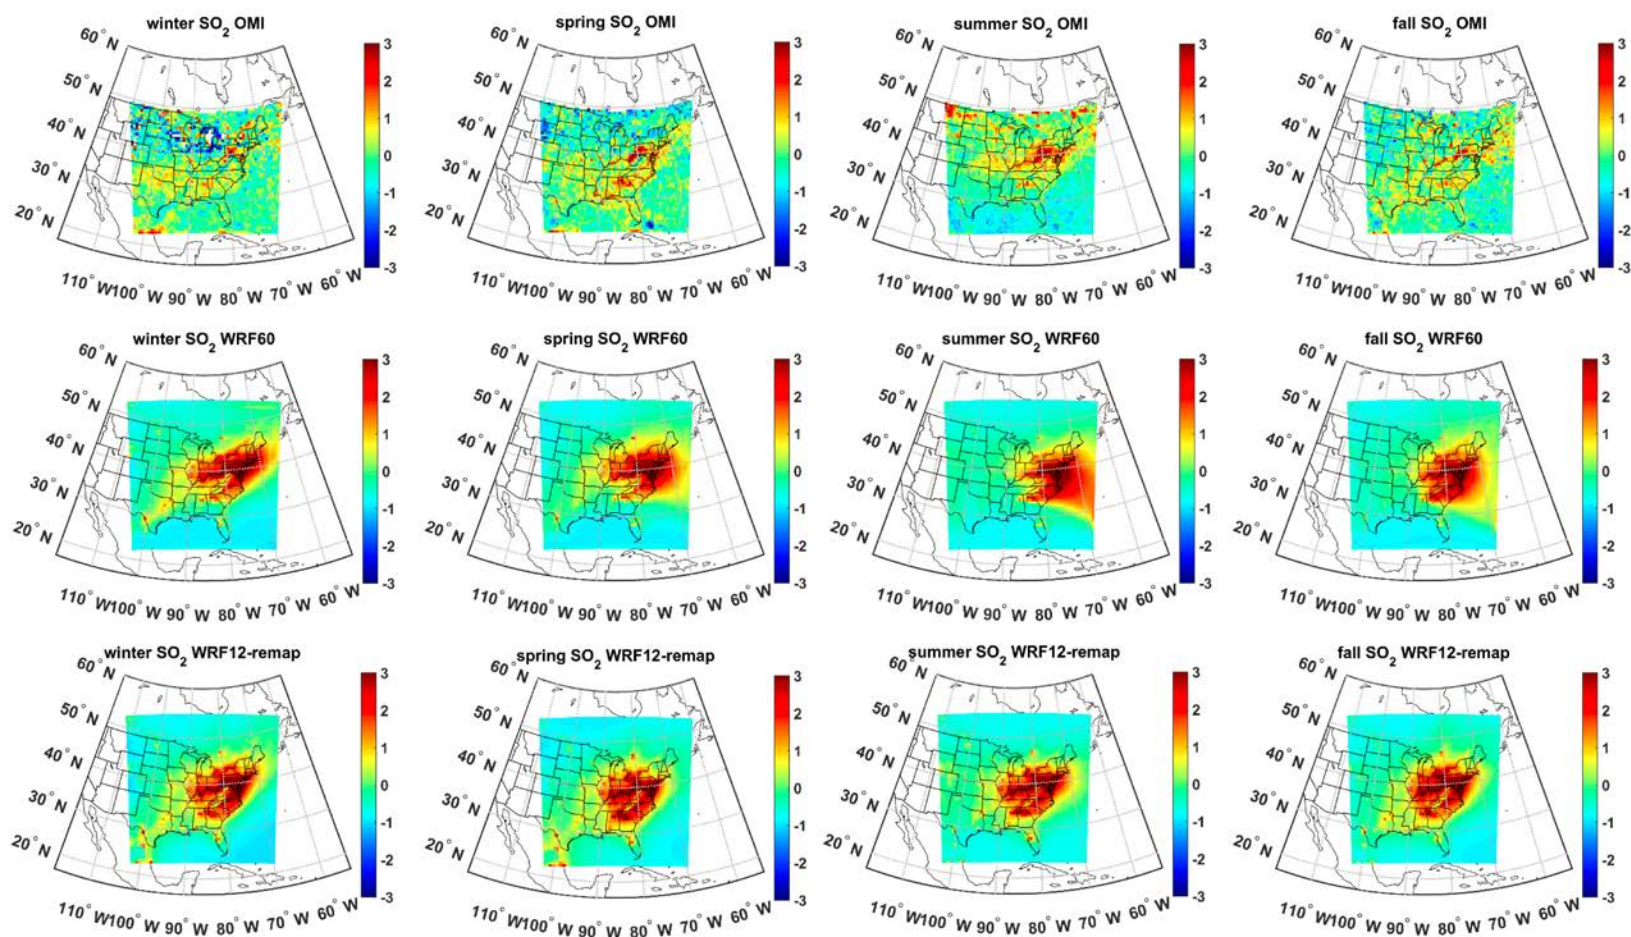

Figure S5. Seasonal total column NO<sub>2</sub> z-scores from OMI (first row), WRF60 (second row), and WRF12-remap (third row). z-scores are computed relative to the spatial seasonal mean of each dataset and indicate the distance from the mean in terms of standard deviation units. A cloud screen of 0.3 is applied to both satellite observations and simulated values. Only grid cells with at least 5 valid observations in a month are used to compute a mean value, otherwise the grid cell is shown as white.



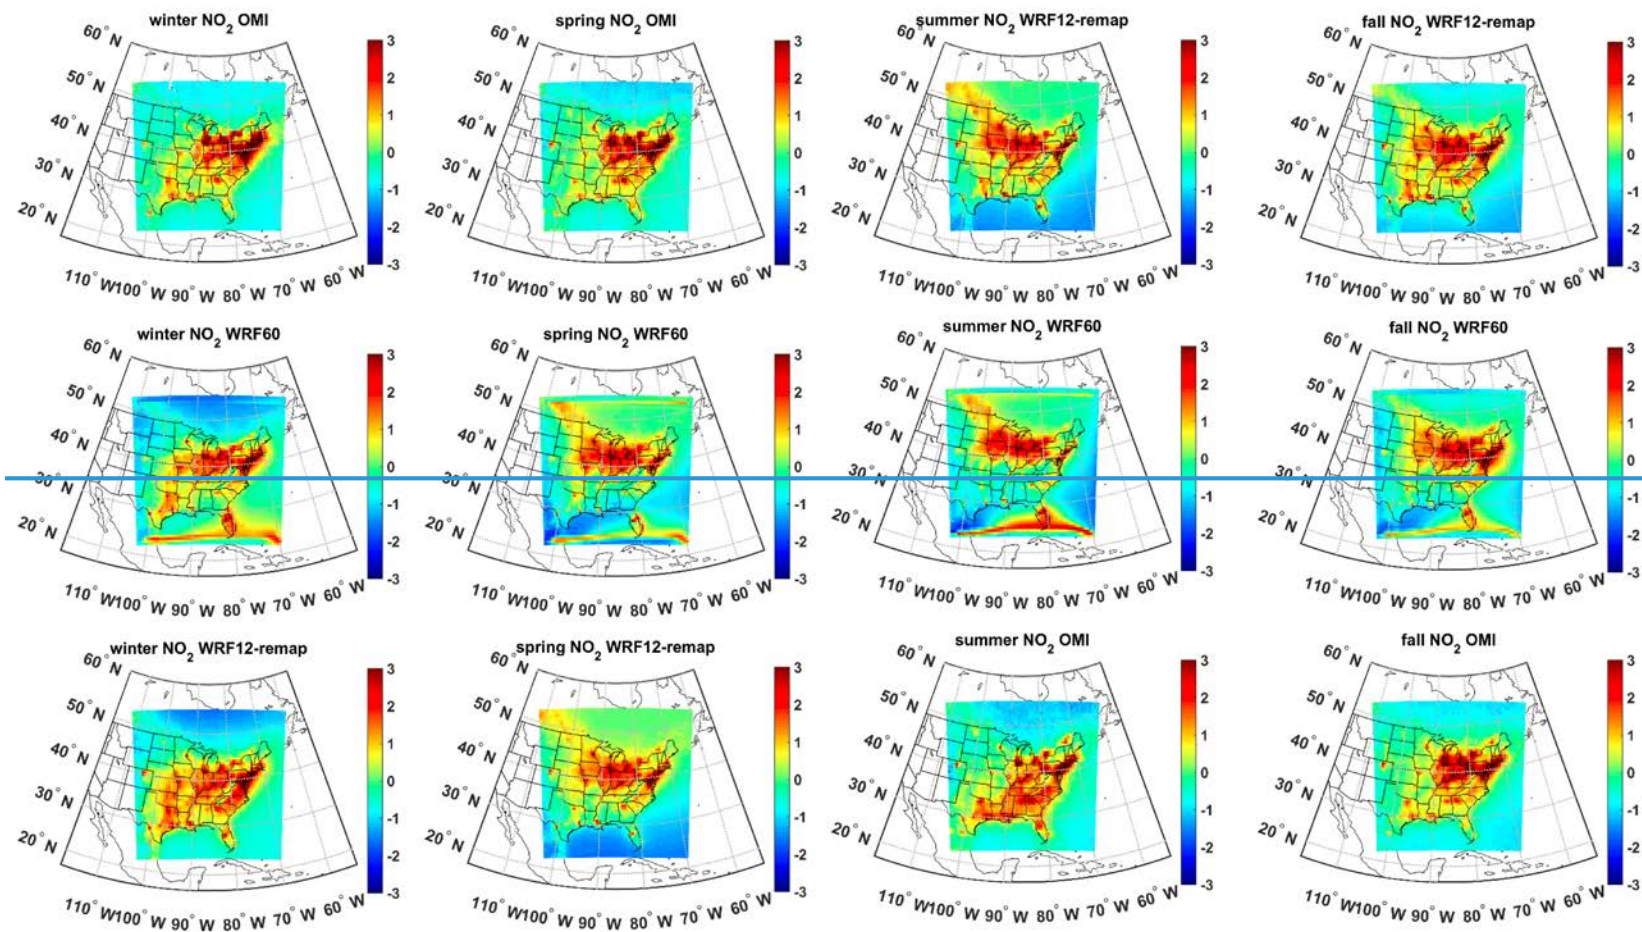

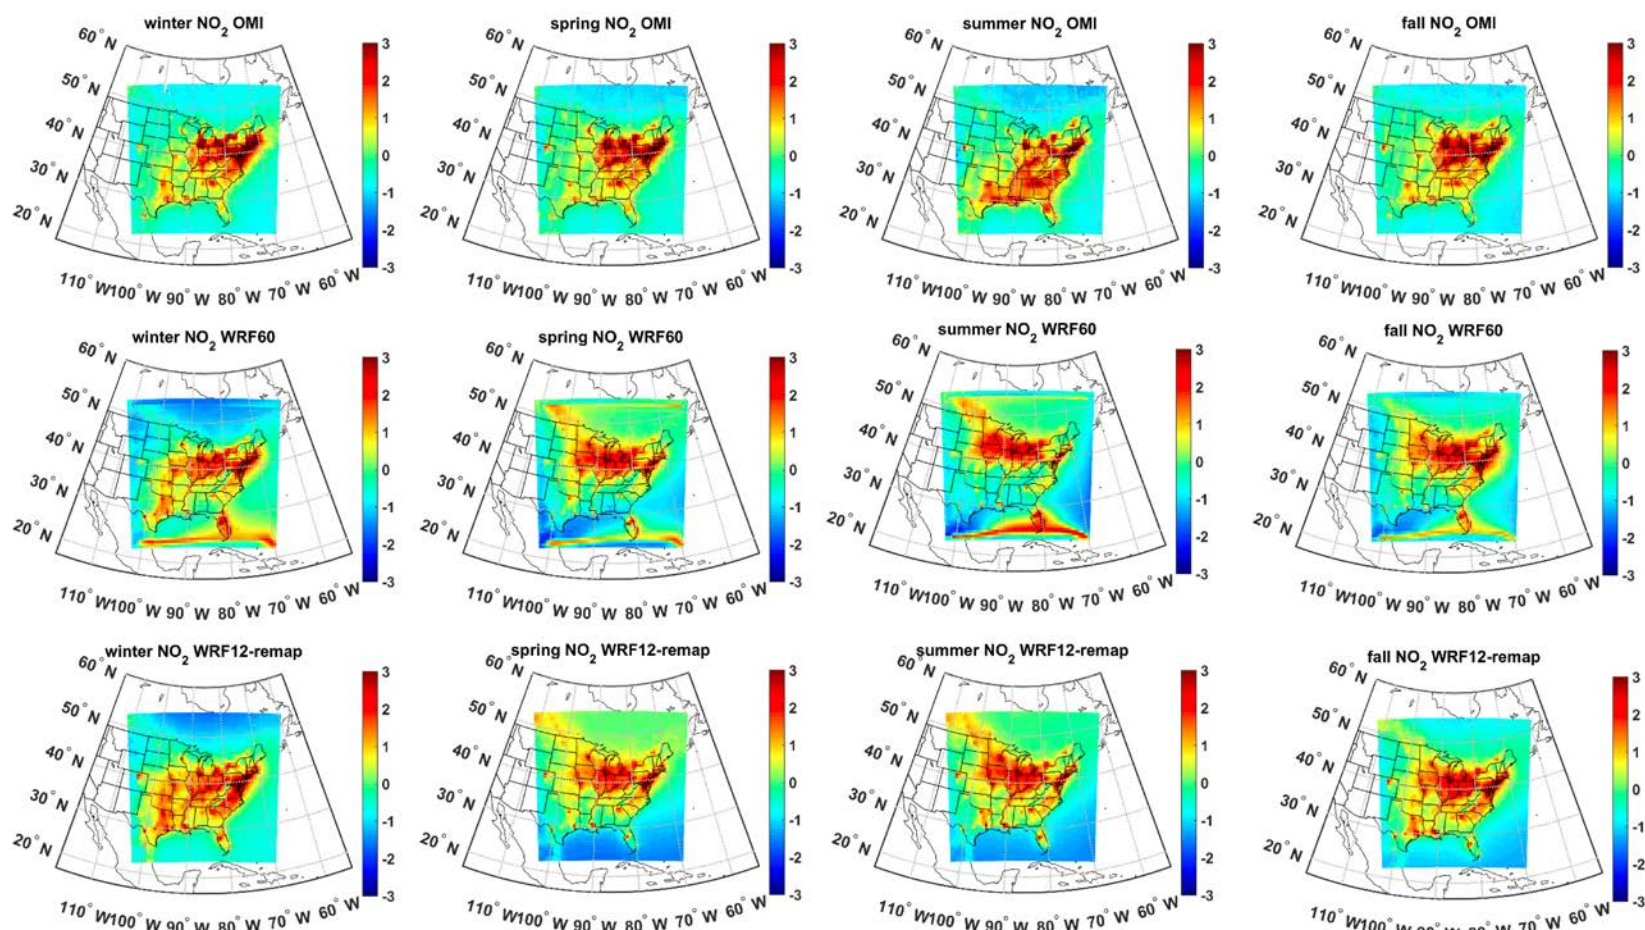

Figure S6. Seasonal total column  $\text{NH}_3$  z-scores from OMI (first row), WRF60 (second row), and WRF12-remap (third row). z-scores are computed relative to the spatial seasonal mean of each dataset and indicate the distance from the mean in terms of standard deviation units. A cloud screen of 0.3 is applied to both satellite observations and simulated values. Only grid cells with at least 5 valid observations in a month are used to compute a mean value, otherwise the grid cell is shown as white.



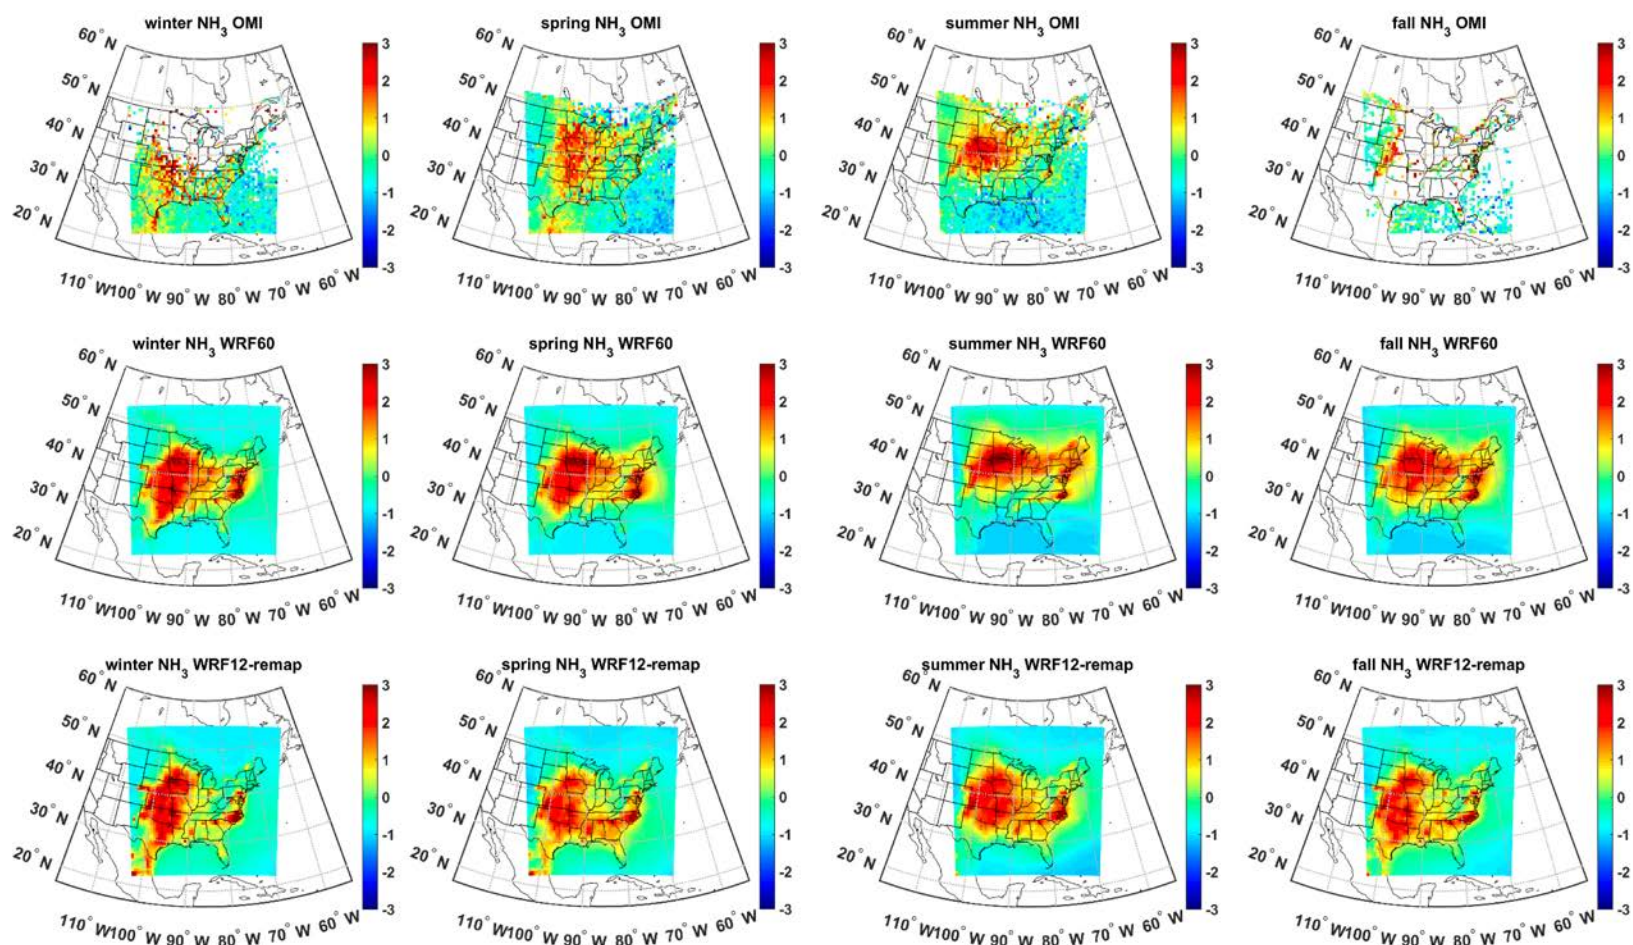

Figure S7. Seasonal total column HCHO z-scores from OMI (first row), WRF60 (second row), and WRF12-remap (third row). z-scores are computed relative to the spatial seasonal mean of each dataset and indicate the distance from the mean in terms of standard deviation units. A cloud screen of 0.3 is applied to both satellite observations and simulated values. Only grid cells with at least 5 valid observations in a month are used to compute a mean value, otherwise the grid cell is shown as white.

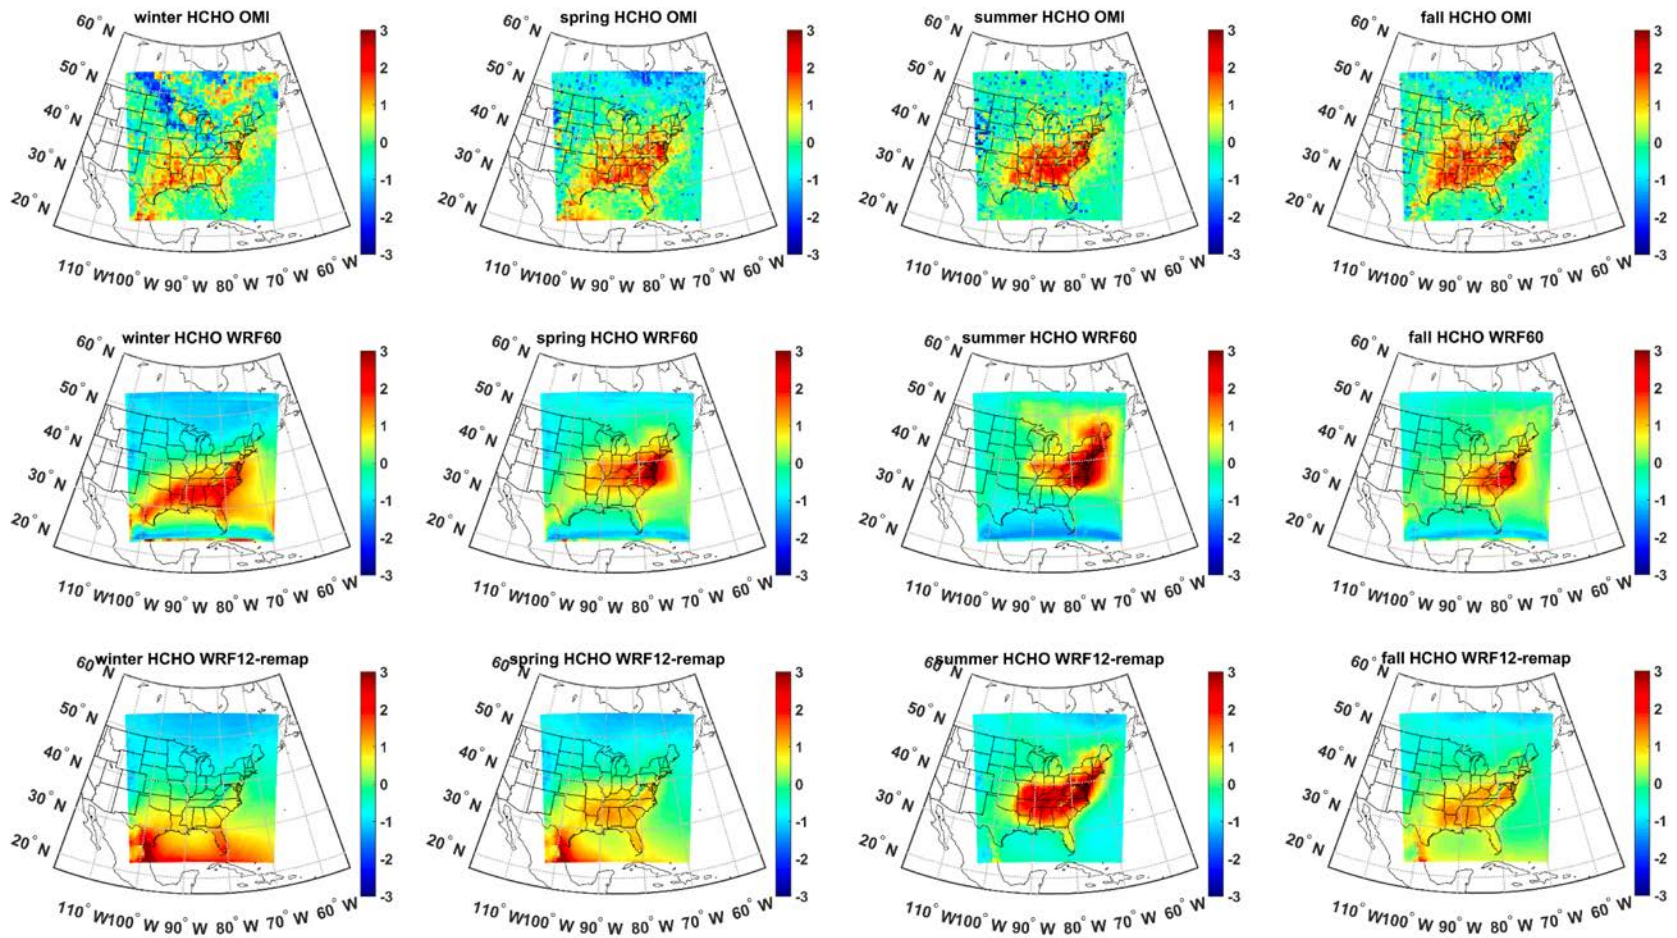

Supplement: Supplementary file [file acp-2016-453-AC2-supplement.pdf]
